1 **eDNA metabarcoding as a biomonitoring tool for marine protected areas**

2

3 Zachary Gold <sup>1,\*</sup>, Joshua Sprague <sup>2</sup>, David J. Kushner <sup>2</sup>, Erick Zerecero<sup>1</sup>, Paul H. Barber <sup>1</sup>

4

5

6 <sup>1</sup>Department of Ecology and Evolutionary Biology, University of California – Los

7 Angeles

8 <sup>2</sup>Channel Islands National Park Service

9

10

11

12 \* Correspondence: Zachary Gold, Email: [zack.gold@ucla.edu](mailto:zack.gold@ucla.edu); Tel.: +01-310-795-0020,

13 Address: 610 Charles E. Young Dr. S, Los Angeles, CA, 900095

14

15 **Short Title:** eDNA marine protected area biomonitoring

16

17

18

19

20

21

22

23

24

25

26

27 **Abstract**

28 Monitoring of marine protected areas (MPAs) is critical for marine ecosystem  
29 management, yet current protocols rely on SCUBA-based visual surveys that are costly  
30 and time consuming, limiting their scope and effectiveness. Environmental DNA (eDNA)  
31 metabarcoding is a promising alternative for marine ecosystem monitoring, but more  
32 direct comparisons to visual surveys are needed to understand the strengths and limitations  
33 of each approach. This study compares fish communities inside and outside the Scorpion  
34 State Marine Reserve off Santa Cruz Island, CA using eDNA metabarcoding and  
35 underwater visual census surveys. Results from eDNA captured 76% (19/25) of fish  
36 species and 95% (19/20) of fish genera observed during pairwise underwater visual  
37 census. Species missed by eDNA were due to the inability of MiFish *12S* barcodes to  
38 differentiate species of rockfishes (*Sebastes*, n=4) or low site occupancy rates of crevice-  
39 dwelling *Lythrypnus* gobies. However, eDNA detected an additional 30 fish species not  
40 recorded in paired visual surveys, but previously reported from prior visual surveys,  
41 highlighting the sensitivity of eDNA. Significant variation in eDNA signatures by location  
42 (50m) and site (~1000m) demonstrates the sensitivity of eDNA to address key questions  
43 such as community composition inside and outside MPAs. Interestingly, eDNA results  
44 recorded higher species richness outside the MPA while visual surveys observed the  
45 opposite pattern. This result is likely caused by swamping effects of high fish abundance  
46 in MPAs that reduce detection probabilities of pelagic and intertidal taxa. Results  
47 demonstrate the utility of eDNA metabarcoding for monitoring marine ecosystems,  
48 providing an important complementary tool to visual methods.

49 **Keywords:** biomonitoring; Channel Islands National Park; eDNA; environmental DNA;  
50 marine protected areas; MPAs.

51

## 52 **Introduction**

53 Marine Protected Areas (MPAs) promote sustainability of marine ecosystems and the  
54 ecological goods and services they provide (1). However, ensuring MPA effectiveness  
55 requires regular monitoring to document that ecosystem health is stable or improving (1).  
56 MPA monitoring also provides an essential opportunity to assess the impact of management  
57 practices, allowing resource managers to adjust management plans as required (2).

58 Current MPA monitoring protocols typically assess the diversity and abundance of fish  
59 and benthic invertebrates, as well as community trophic structure (3). Much of this  
60 assessment is based on underwater visual census surveys conducted on SCUBA (3), which  
61 are costly, and time and labor intensive (3). For example, to survey 33 sites within the  
62 Channel Islands National Park once per year, the National Park Service Kelp Forest  
63 Monitoring Program spends over \$395,000 on ~1,000 hours of dive time, ~1,400 hours of  
64 data entry to survey 33 sites within the Channel Islands National Park once per year (J.  
65 Sprague per obs., 2020). Furthermore, SCUBA-based surveys are constrained by weather,  
66 diving conditions, and personnel (J. Sprague per. obs., 2020), and can require extended and  
67 repeated dives to accurately document marine communities that place divers at risk for  
68 dive-related injuries. SCUBA surveys can also introduce significant observer bias, as fish  
69 react differently to divers, particularly inside and outside of MPAs, potentially impacting  
70 survey results (5).

71 Given the above logistical and methodological constraints, MPA monitoring efforts are  
72 largely limited to shallow depths (e.g. <30m) and the most economically or ecologically  
73 important taxa as proxies for ecosystem health (6). Moreover, examining a predetermined  
74 subset of community diversity potentially excludes crucial functional groups, biasing  
75 ecosystem assessment (7). Combined, these issues restrict the scope, scale, and frequency  
76 of visual surveys, limiting the utility of SCUBA-based MPA surveys to quantify  
77 biodiversity and trophic structure, (3), data essential for assessing MPA effectiveness.

78 One promising new approach for assessing and monitoring marine ecosystems is  
79 environmental DNA, or “eDNA”, a technique based on isolation and sequencing of freely  
80 associated DNA from soil or water samples (8). Through metabarcoding and high-  
81 throughput next generation sequencing, eDNA can broadly survey community biodiversity  
82 in a rapid, repeatable, and affordable manner (8). As such, eDNA is ideally suited to  
83 intensive biodiversity monitoring programs, such as those required for MPAs (9).

84 eDNA has some key advantages over traditional SCUBA-based survey methods. First,  
85 eDNA can capture a wide diversity of marine vertebrate taxa, frequently detecting more  
86 species than traditional fish survey methods (10). Second, eDNA detects rare and cryptic  
87 species that are frequently overlooked or ignored in traditional survey methods (11,12),  
88 including both endangered and invasive species (8). Third, eDNA collection is relatively  
89 simple, requiring only small volumes of seawater (< 3L) and simple filtering techniques,  
90 allowing sampling by individuals with limited training, even in remote locations (Miya et  
91 al., 2016). Forth, because eDNA doesn’t require diving, there are significant worker safety  
92 advantages. Lastly, eDNA is affordable (e.g. ~\$50/sample) and has the potential for  
93 automation, allowing for remote sample collection and high throughput autonomous lab  
94 processing (14).

95 Despite these advantages, eDNA also has limitations. Of particular concern is PCR  
96 bias that can result in preferential amplification of particular taxa (15). Additionally,  
97 detection probabilities can be influenced by species specific eDNA generation and  
98 degradation rates (8), an issue potentially further complicated by the transport of eDNA on  
99 ocean currents (16). Furthermore, primer design, bioinformatic, and reference database  
100 limitations can also affect the accuracy of taxonomic assignment from eDNA (17).

101 Unlike well-established visual surveys, the impact of biases in eDNA metabarcoding  
102 are not well characterized, and may be less problematic than believed. For example recent  
103 studies show that impacts of PCR bias can be mitigated by technical replicates and site

104 occupancy modelling (17–19). Similarly, because eDNA signals decay relatively rapidly  
105 (e.g. hours to days; (20,21), eDNA signatures are surprisingly stable (22). As such, eDNA  
106 holds tremendous promise for monitoring marine ecosystems. Realizing that promise,  
107 however, requires a better understanding of how visual surveys and eDNA metabarcoding  
108 approaches compare in direct field applications.

109 The Channel Islands MPA Network spans >1000 reefs across 8 islands of the coast of  
110 Southern California. It is monitored by several programs including the Kelp Forest  
111 Monitoring Program, which conducts visual monitoring surveys of 41 invertebrates and  
112 over 100 fishes (23). In total only 94 of the >1000 Channel Island reefs are surveyed, and  
113 just once per year (6), missing the seasonal dynamics in the variable Southern California  
114 Bight, limiting the scope and scale of assessment (2). While born of logistical necessity, the  
115 spatial and temporal limits of this survey protocol makes accurately assessing the health of  
116 this MPA network difficult (2,24) and suggests the need for new approaches that produce  
117 data on broader taxonomic, spatial and temporal scales.

118 This study tests the efficacy of eDNA for MPA monitoring and to better understand the  
119 advantages and shortcomings of eDNA methods. We do this through a side-by-side  
120 comparisons of eDNA metabarcoding and visual surveys of fish communities conducted by  
121 the National Parks Service.

## 122 **Materials and Methods**

### 123 *Sample Collection*

124 We conducted our study at Scorpion State Marine Reserve within the Channel Islands  
125 National Park and National Marine Sanctuary. To determine the degree to which eDNA  
126 could capture documented differences inside and outside this MPA, we sampled three sites:  
127 1) inside the MPA, 2) outside but adjacent (<0.5km) to the MPA (“edge site”), and 3) 2.3km  
128 outside the MPA boundary (“outside site”; Figure 1). At each of these three sites, we sampled

129 directly along a 100 m fixed transect used by the Kelp Forest Monitoring Program for visual  
130 monitoring, using a GPS to ensure transects overlapped (23). We collected three replicate 1L  
131 water samples from three locations on each transect, totaling 9 spatially structured replicates  
132 per site. Due to fieldwork logistical challenges, each site was sampled on a different day with  
133 a maximum of 72 hours between sampling events.

134 **Figure 1.** Map of Scorpion State Marine Reserve off Santa Cruz Island, CA, USA.

135 We collected seawater samples from 10 m below the surface and 1 m above the benthos  
136 using a 4 L Niskin bottle deployed from the UCLA RV Kodiak (25). From each Niskin  
137 deployment, we transferred a single liter of seawater to an enteral feeding pouch and  
138 conducted gravity filtration through a sterile 0.22  $\mu\text{m}$  Sterivex cartridge (MilliporeSigma,  
139 Burlington, MA, USA) in the field (Miya et al., 2016). Additionally, we processed three field  
140 blanks as a negative control that consisted of 1 L of distilled water following the method  
141 above. Finally, we dried Sterivex filters using a 3 mL syringe and then capped and stored the  
142 filters at  $-20^{\circ}\text{C}$  for DNA laboratory work back at UCLA (Miya et al., 2015).

#### 143 *DNA Extraction and Library Preparation*

144 We extracted eDNA from the Sterivex cartridge using the DNAeasy Tissue and Blood Kit  
145 (Qiagen Inc., Germantown, MD) following modifications of Spens et al. (2017). We PCR  
146 amplified the extracted eDNA using the MiFish Universal Teleost *I2S* primer (Miya et al.,  
147 2015) with Nextera modifications following PCR and the library preparation methods of  
148 Curd et al. (2019) (See supplemental methods). All PCRs included a negative control where  
149 molecular grade water replaced the DNA extraction. For positive controls, we used DNA  
150 extractions of grass carp (*Ctenopharyngodon idella*, Cyprinidae) and Atlantic salmon (*Salmo*  
151 *salar*, Salmonidae), both non-native to California. Libraries were sequenced on a MiSeq PE  
152 2x300bp at the Technology Center for Genomics & Bioinformatics (University of California-  
153 Los Angeles, CA, USA), using Reagent Kit V3 with 20% PhiX added to all sequencing runs.

154 *Bioinformatics*

155 To determine community composition, we used the *Anacapa Toolkit* to conduct quality  
156 control, amplicon sequence variant (ASV) parsing, and taxonomic assignment using user-  
157 generated custom reference databases (28). We processed sequences using the default  
158 parameters and assigned taxonomy using two reference databases. We first assigned  
159 taxonomy using the FishCARD California fish specific reference database (Gold 2020).  
160 Second, we used the *CRUX*-generated *I2S* reference database supplemented with FishCARD  
161 reference sequences to assign taxonomy using all available *I2S* reference barcodes to identify  
162 any non-fish taxa.

163 Raw ASV community table was decontaminated following Kelly et al. (2018) and  
164 McKnight et al. (2019) (See supplemental methods). We then transformed all read counts  
165 into an eDNA index for beta-diversity statistics (15). All non-fish species (mammals and  
166 birds) were removed prior to final analyses.

167 *eDNA Data Analysis*

168 To test for alpha diversity differences, total species richness for each site was then compared,  
169 using an Analysis of Variance (ANOVA) and subsequent Levine's test for homogeneity of  
170 dispersions (31).

171 To determine whether our eDNA sampling design was sufficient to fully capture fish  
172 community diversity, we created species rarefaction curves using the *iNext* package (32).  
173 Species coverage estimates were then compared between each site, with and without site  
174 occupancy modeling, and using all three 1L replicates taken at three locations along a 100m  
175 transect (n=9) as well as only three 1L biological replicates (n=3). We ran a piecewise  
176 regression analysis to identify breakpoints in the rate of species diversity found per sample  
177 collected using the *R* packaged *segmented* (33).

178 To test for differences among fish communities, we calculated Bray-Curtis similarity  
179 distances on the eDNA index scores between all samples (22). Specifically, we tested for the

180 difference in community similarity variance between our three sites using an *adonis*  
181 PERMANOVA (31), followed by a companion multivariate homogeneity of group dispersions  
182 test (BETADISPER) (31). Both the PERMANOVA and BETADISPER were run using the  
183 following model: eDNA Index ~ Site + Location. We also visualized community beta  
184 diversity using non-metric multidimensional scaling (NMDS) (31). To further investigate  
185 which species were driving eDNA community differences among sites, we conducted  
186 constrained analysis of principle components (CAP) (31).

### 187 *Visual Underwater Census Methods*

188 To assess fish communities using underwater visual census techniques, SCUBA divers from  
189 the Kelp Forest Monitoring Program followed standard survey protocols following Kushner  
190 et al. (2013). These protocols include survey types: visual fish transects, roving diver fish  
191 counts, and 1m quadrats. The visual fish transects targeted 13 indicator species of fish on  
192 visual fish transects recording the counts of adults and juveniles. This protocol consists of  
193 performing 2m x 3m x 50 m transects along the 100 m permanent transect. During roving  
194 diver fish count surveys all positively identified species are recorded. This protocol consists  
195 of 3-6 divers counting all fish species observed during a 30 minute time period, covering as  
196 much of the 2000 m<sup>2</sup> of bottom and entire water column as possible. The 1 m<sup>2</sup> quadrat  
197 records three small demersal species of fish. All visual surveys occurred along a permanent  
198 100 m transect at each site and were conducted within 2 weeks of eDNA sampling (See  
199 supplemental methods).

### 200 *Comparison of eDNA and Visual Underwater Census Methods*

201 We compared species detected by eDNA and underwater visual census approaches across  
202 corresponding transects at each site. We identified core taxa that were shared across all sites  
203 for a given method. In addition, we identified species that eDNA methods failed to detect but



204 were observed in visual census surveys and vice versa. We note that given the few numbers  
205 of sites (n=3) we were unable to robustly compare abundance estimates between methods.

## 206 **Results**

### 207 *eDNA Results*

208 We generated over 4 million reads that passed quality control. The *Anacapa Toolkit*  
209 identified 2,906 ASVs from 3,091,063 reads representing 27 samples and 8 controls. After  
210 the second decontamination step, however, totals reduced to 931 ASVs and 2.35 million  
211 reads (Tables S1-S3).

212 Combined, eDNA metabarcoding successfully detected 54 fish taxa, representing 50  
213 unique species, 48 genera, 34 families, and two classes (Tables S1-S3). eDNA detected 35  
214 species within the MPA, 34 at the edge, and 42 species outside the MPA. The three sites  
215 shared a core group of 26 taxa including bony fish and one species of ray (Figure 2) (Table  
216 S4). Of these taxa, 15 species are associated with rocky reef habitat, five species are  
217 associated with sandy bottom habitat, four species are pelagic-neritic, and two species are  
218 pelagic-oceanic.

### 219 **Figure 2.** Venn Diagram of Fish Species Detected with eDNA

220 Species rarefaction curves showed that sampling at each site (n=9) was insufficient to  
221 capture all species diversity (Figure 3). Sample coverage estimates from eDNA results  
222 before filtering by site occupancy modeling filters were 94.0%, 88.0%, and 92.9% for the  
223 MPA, edge, and outside sites, respectively. Coverage estimates dropped to 81.0%, 80.0%,  
224 83.6% for the MPA, edge, and outside sites, respectively, when only three 1L samples were  
225 used. Piecewise regression analysis showed a transition from exponential to linear increase  
226 in species detected per replicate between three and four replicate water samples per site  
227 (3.36-3.53) with subsequent diminishing sample coverage returns with the addition of more

228 samples. In contrast, species diversity was near saturated (>99.0%) when applying a site  
229 occupancy rate above 75% and using three 1 L replicates taken at three locations along a  
230 100 m transect. However, using only three samples, sample coverage dropped to 87.1%,  
231 90.3%, 88.9% for the MPA, edge, and outside sites, respectively.

232 **Figure 3. Species Rarefaction Curves. a)** Species rarefaction curves for all fishes  
233 found at each site across 3 1L replicates taken at 3 locations along a 100m transect.  
234 **b)** Species rarefaction curves for fish species with occupancy rates above 75% found  
235 at each site across 3 1L replicates taken at 3 locations along a 100m transect. Sample  
236 coverage estimates were higher for species with occupancy rates above 75% (100%)  
237 than for all species (85.8%-93.1%). For species with occupancy rates above 75%  
238 sample coverage estimates ranged from 89.3-91.1% for only 3 1L replicates.

239 Analyses showed a significant difference in the total number of observed species across  
240 sites, with the site outside the MPA having significantly higher diversity than both the edge  
241 and MPA sites (ANOVA,  $p < 0.001$ , Levine's test  $p > 0.5$ ). Observed species differences  
242 between sites were partially driven by the presence of non-rocky reef taxa (46.4%, 13/28),  
243 primarily pelagic, mobile, sandy bottom, and intertidal species. Moreover, there were also  
244 significant differences in fish communities among the three sites as well as among the three  
245 sampling locations along each of the three transects (PERMANOVA  $p < 0.001$ , betadisper  
246  $p > 0.05$ ). Location along the transect explained 26.4% of the total variance while site (e.g.  
247 inside, edge and outside MPA) explained 19.0% of the total variance; 54.5% of the total  
248 variance was unexplained.

249 NMDS ordination showed weak clustering of samples by both location and site  
250 (NMDS, Stress 0.20; Figure 4). Constrained analysis of principle components (CAP) found  
251 significant differences in species assemblages between samples collected at different sites  
252 and locations (CAP,  $p < 0.001$ ) (Figure 5), further indicating difference in eDNA signatures

253 across sites and locations. CAP analysis identified seven taxa with the strongest differences  
254 between sites. The MPA site had higher eDNA index scores of kelp perch (*Brachyistius*  
255 *frenatus*, Embiotocidae), sarcastic fringehead (*Neoclinus blanchardi*, Chaenopsidae), and  
256 spotted cusk-eel (*Chilara taylori*, Ophidiidae). The edge site had higher index scores of  
257 roughback sculpin (*Chitonotus pugetensis*, Cottidae). The site outside the MPA had higher  
258 index scores of yellowtail amberjack (*Seriola lalandi*, Carangidae), sand bass sp.  
259 (*Paralabrax* spp., Serranidae), and dog-faced witch eel (*Facciolella gilberti*,  
260 Nettastomatidae).

261 **Figure 4.** NMDS of Bray-Curtis Dissimilarities. Bray-Curtis dissimilarities were  
262 calculated between all samples using only species with occupancy rates over 75%.  
263 Samples from Sites (colors) and locations (shapes) are similar to each other (NMDS,  
264 Stress = 0.20).

265 **Figure 5.** Constrained Analysis of Principle Components (CAP) Ordination. Bray-  
266 Curtis dissimilarities were calculated between all samples using only species with  
267 occupancy rates over 75%. Samples from sites and locations within sites were used  
268 as independent variables. Site and locations within sites are significantly more  
269 similar to each other (CAP,  $p < 0.001$ ). Sites (shapes) and Locations (colors) are  
270 plotted against CAP1 and CAP2 axes. Arrows correspond to direction and strength  
271 (length) of each species. Only the top 7 species with CAP distances greater than 0.35  
272 were plotted.

273

274

275 *Visual Census Surveys Results*

276 Across all three sites, 25 bony fish species were recorded using underwater visual censuses,  
277 representing 20 genera, 13 families, and one class (Figure 6) (Table S5), 11 of which were  
278 shared across all three sites (Table S6). Within the MPA site, visual census methods  
279 detected 21 unique species, 18 genera, and 11 families. At the edge site visual census  
280 methods detected 18 species, 16 genera, 11 families, and four classes. Lastly, at the outside  
281 site visual census methods detected 13 species, 13 genera, 10 families, and four classes. Of  
282 all taxa observed in visual census methods, 24 species were associated with rocky reef  
283 habitat and one species was pelagic-neritic. The pelagic-neritic species, top smelt  
284 (*Atherinops affinis*, Atherinopsidae), was only found in the MPA site.

285 On average, roving diver fish counts recorded 17.6 species per replicate survey  
286 (Range: 10-22). Visual fish counts recorded an average 7.8 species per replicate survey out  
287 of the 13 indicator species (Range: 5-10). 1m quadrats recorded an average 2.3 species of 3  
288 target species (Range: 1-3).

289 **Figure 6.** Venn Diagram of Species Observed from Visual SCUBA Surveys.

290

### 291 *Comparison of eDNA and Visual Census Surveys*

292 eDNA detected 76% (19 out of 25) of species observed during all combined National Park  
293 Service transect surveys (Table S5-S6). eDNA failed to resolve *Lythrypnus dalli*  
294 (Gobiidae), *L. zebra*, *Sebastes atrovirens* (Sebastidae), *S. auriculatus*, *S. chrysomelas*, and  
295 *S. serranoides* to species level. At the genus level, eDNA performed markedly better  
296 recovering 95% (19 out of 20) of genera observed during under water censuses. The  
297 remaining genus *Lythrypnus* was detected prior to site occupancy modeling, but occurred in  
298 only one replicate at two separate sites.

299 In addition to the above, eDNA recovered 31 species that were not recorded during the  
300 visual censuses conducted by the National Park Service. Of these, 30 were California fish

301 species previously recorded in Kelp Forest Monitoring Program surveys (Table S7), but not  
302 observed during our paired surveys. In addition, eDNA detected the California native dog-  
303 faced witch eel (*Facciolella gilberti*, Nettastomatidae) that had not previously been  
304 observed by the Kelp Forest Monitoring Program.

305 There were few conspicuous differences in species observed across sites, with visual  
306 census results identifying 11 common taxa across all sites (Table S6). Of these, 10 were  
307 also found to be common across all sites using eDNA methods with one species  
308 (*Lythrypnus dalli*) not detected by eDNA. Species richness from visual census data showed  
309 that fish diversity was highest within MPA (n=21), lowest outside the MPA (n=13) and  
310 intermediate (n=18) on the edge of the MPA, while eDNA had the opposite pattern.

## 311 **Discussion**

312 Results demonstrate the power of for detecting a broad range of fish biodiversity in  
313 California kelp forest ecosystems, providing more detailed species inventories needed for  
314 marine ecosystem monitoring (9). eDNA was able to detect significant differences in fish  
315 communities inside, on the edge of, and outside of the Scorpion State Marine Reserve, even  
316 though the closest sites were no more than 500 m apart. Even within each of these sampling  
317 sites, eDNA distinguished among sample locations separated by only 50 m, highlighting the  
318 sensitivity of eDNA in capturing local fish communities, and matching previous studies  
319 showing fine-scale spatial resolution of eDNA signatures (12).

320 Importantly, eDNA captured 76% of fish diversity observed during visual surveys,  
321 despite species rarefaction indicating insufficient sampling. In total, eDNA only failed to  
322 identify six of 25 fish species observed during visual surveys, four of these being rockfish  
323 (*Sebastes*, Sebastidae), a taxon that *12S* barcoding cannot distinguish to species (29). This  
324 small deficiency was offset by detecting an 30 additional fish taxa not recorded during  
325 paired Kelp Forest Monitoring Program visual monitoring, representing an important

326 advantage of eDNA. Because sampling can be obtained easily and processed economically,  
327 eDNA could allow for more frequent monitoring, expanding the scope of MPA monitoring  
328 programs while providing greater personnel safety.

### 329 *The utility of eDNA for MPA monitoring*

330 Despite the limited sampling design and the inability of our *12S* barcode to distinguish  
331 species of rockfish and gobies, eDNA largely recovered the same taxa observed in visual  
332 census surveys. This strong concordance likely stems from high eDNA detection  
333 probabilities lasting only a few hours (20), such that eDNA captures marine communities  
334 that were recently present (21). The similarity of eDNA and visual surveys is even more  
335 remarkable given that eDNA and visual surveys were taken two weeks apart, a result that  
336 strongly suggests that fish diversity captured by eDNA is truly representative of fish  
337 communities and their differences inside and outside the Scorpion State Marine Reserve  
338 (22).

339 In addition, eDNA recorded an addition 30 species not recorded from visual surveys,  
340 but have been previously reported in other Kelp Forest Monitoring Program surveys (Table  
341 S7). Importantly, these taxa included species of significant management concern such as  
342 endangered giant black seabass (*Stereolepis gigas*, Polyprionidae) and important  
343 commercial targets like yellowtail amberjack (*Seriola lalandi*, Carangidae). Additionally,  
344 although we focused on teleost fishes, our eDNA data included elasmobranchs, marine  
345 mammals, and marine birds, taxa that play important roles in nearshore rocky reef  
346 ecosystems, but that can be difficult to survey and monitor (9). The expanded taxonomic  
347 coverage and the ability to detect rare, or hard to observe taxa is a significant advantage of  
348 eDNA over traditional visual surveys, expanding the scope of MPA monitoring by capturing  
349 entire communities rather than a selected subset of taxa.

350 Key to MPA monitoring is the ability to distinguish among communities inside and  
351 outside of the MPA. Not only did eDNA detect significant differences inside and outside the

352 MPA, it could also differentiate among samples taken 50 m apart. This result adds to a  
353 growing literature that shows the fate and transport of eDNA in marine environments is  
354 relatively limited in space and time (20,34,35), and highlights the suitability of eDNA for  
355 comparing inside and outside of even relatively small MPAs (12).

356 While eDNA found significant differences inside and outside of the MPA and provided  
357 data on more taxa than visual survey methods, it did it for a fraction of the cost and effort.  
358 Roving fish diver counts, the most similar visual survey to eDNA monitoring methods, costs  
359 the Kelp Forest Monitoring Program ~\$1,200 per site (Table S8). In contrast, the eDNA  
360 sampling design employed in this study including materials, labor, and transportation was  
361 ~\$600 per site (Table S9)—and 25% of this total was just transportation. Moreover, total  
362 costs could have been significantly reduced by sampling in one day, which was not possible  
363 due to vessel logistics. Further cost efficiencies can come from automating lab methods and  
364 conducting sequencing in house (8).

365 In addition to the above, eDNA has other significant advantages. It can potentially detect  
366 invasive species, even when rare (8). Sequence data from eDNA provides an annual snapshot  
367 of standing genetic diversity, providing the ability to monitor changes over time (9).  
368 Similarly, in species with population structure, eDNA could provide evidence of range shifts  
369 associated with climate change (36). Importantly, given eDNA metabarcoding samples can  
370 be preserved and archived, eDNA samples can be reanalyzed in the future with improved  
371 metabarcoding methods to answer additional hypotheses and environmental monitoring goals  
372 (8). Combined, the above advantages of eDNA suggest that even if eDNA metabarcoding is  
373 not viewed as a full replacement for visual surveys, the power of this method, and its ease  
374 of sampling and affordability argue for using eDNA as a critically important complementary  
375 tool to greatly expand current monitoring activities.

376 *Limitations and Caveats of eDNA*

377 Although this and other studies highlight the promise of eDNA for monitoring marine  
378 ecosystems, there are also important limitations. One key limitation is the lack of universal  
379 barcode loci. Four of the six undetected species in this study were rockfish in the genus  
380 *Sebastes*. While the MiFish 12S metabarcoding primers have broad utility in vertebrates,  
381 rockfishes are a recent adaptive radiation (37) with a highly conserved 12S sequence,  
382 resulting in the inability to distinguish among rockfish ASVs. Identifying rockfish to  
383 species using eDNA approaches is critical for MPA monitoring efforts in California as  
384 *Sebastes* are important for commercial and recreational fisheries (38) and play a wide array  
385 of functional and ecological roles in nearshore ecosystems (37).

386 In addition, eDNA failed to detect two gobies, *Lythrypnus dalli* and *L. zebra*  
387 (Gobiidae). Previous efforts to barcode *L. dalli* for the FishCARD reference database found  
388 two insertions not found in any other California goby, including the sister species *L. zebra*  
389 (29). Thus, primer mismatch may have limited the amplification and detection of some *L.*  
390 *dalli* in our eDNA samples. Alternatively, the eDNA methods employed here may not be  
391 suited for small, crevice-dwelling fish species such as gobies. Species of *Lythrypnus* rarely  
392 leave the reef boundary layer (39). As such their eDNA maybe entrained close to the reef,  
393 resulting in hyper-spatial variability of eDNA signatures (12). More work is necessary to  
394 determine whether eDNA can reliably detect species living in interstitial reef habitat. This  
395 limitation, however, is not unique to eDNA as the Kelp Forest Monitoring Program  
396 employs 1 m<sup>2</sup> quadrat surveys, specifically designed to capture these taxa. Likewise eDNA  
397 surveys that specifically sample within the boundary layer may be needed to survey benthic  
398 cryptic species.

399 Another limitation of eDNA is standardizing processing techniques, including the  
400 spatial design of field sampling, number of replicates, and sequencing depth (8,15,19). The  
401 three replicate water samples taken from a single location and time recovered only 81.5%  
402 of the species present based on modeled species coverage estimates of species with at least



403 75% occupancy. This value increased to near saturation (>99%) by sampling three replicate  
404 water samples from three locations along a 100 m transect. That said, rarefaction curves  
405 indicated that additional sampling would have recovered additional species. These results  
406 provide important benchmarks for replication and sampling efficiency within nearshore  
407 marine environments and highlight the need to adjust sampling intensity and replicates,  
408 depending on the questions to be addressed with eDNA.

409 Despite not achieving saturation with our sampling design, we did observe a transition  
410 from exponential to linear addition of species detections with additional sampling similar to  
411 that previously demonstrated in mesocosm experiments (19). This shift likely reflects the  
412 biological reality of eDNA within marine ecosystems, with a few taxa being abundant and a  
413 long tail of low abundant species (15). As such, while only a few replicates are needed to  
414 capture local core species diversity, high technical (PCR) and biological (bottle) replication  
415 may be required to saturate species detection (19). Thus, if the goal is to detect rare species,  
416 it is imperative to increase sample number, an unsurprising result given the reality of  
417 detection probabilities of rare taxa (18). Despite this caveat and our relatively limited  
418 number of sample replicates, we still detected rare species such as giant black seabass  
419 (*Stereolepis gigas*, Polyprionidae) suggesting that eDNA is likely still superior to visual  
420 techniques at rare species detection (10).

#### 421 *Importance of Site Occupancy Modelling*

422 Site occupancy modeling showed that almost all species (48/50) with occupancy rates  
423 higher than 75% were common Southern California kelp forest species with the exception  
424 of the spotted cusk eel and dog-faced witch eel (40). In contrast, almost all pelagic and  
425 intertidal species that should not be present in a kelp forest had low occupancy rates and  
426 were detected only in a single bottle replicate (Tables S1-S2). These low occupancy  
427 detections cannot be contamination because they did not occur in field or laboratory

428 controls; instead, they likely represent eDNA transported between habitats (16). Regardless,  
429 site occupancy modeling removed the vast majority of unexpected kelp forest fishes,  
430 highlighting its value for determining true species detections in a rigorous and repeatable  
431 way (18,19), aiding in the interpretation and comparison of eDNA results.

432 While site occupancy modelling removed non-kelp forest taxa (e.g. Blue whale;  
433 *Balaenoptera musculus* (Cetacea); California sea lion, *Zalophus californianus* (Otariidae);  
434 pelagic cormorant *Urile pelagicus* (Phalacrocoracidae); Table S10), it also removed some  
435 kelp forest species (e.g. zebra goby, *L. dalli*, Gobiidae; swell shark, *Cephaloscyllium*  
436 *ventriosum*, Scyliorhinidae; zebra-perch *Hermosilla azurea*, Embiotocidae; California angel  
437 shark, *Squatina californica*, Squatinidae). These results highlight the need for increased  
438 replication depending on the management question, just as it may require more visual  
439 surveys to observe numerically rarer taxa, such as sharks. Although the ability of eDNA to  
440 detect marine mammals and birds is useful, visual observations maybe more effective  
441 depending on the taxa, suggesting that complementary methods may yield the most  
442 effective sampling regime (41).

#### 443 *Diversity inside and outside MPAs*

444 Traditional visual surveys most often report higher biodiversity and biomass inside MPAs  
445 (42), including Scorpion State Marine Reserve (6). However, our results surprisingly  
446 indicate lower diversity inside the MPA. This paradoxical result is partially explained by  
447 the inability of eDNA to resolve *Sebastes* species that were visually observed inside (n=3)  
448 and on the edge of the MPA (n=1), but not outside. In addition, despite standardize sample  
449 concentration during pooling, sites outside the MPA had ~50% more read depth. Increased  
450 read depth should increase species detection, although species rarefaction curves suggest  
451 that all samples had sufficient read depth to saturate species richness following site  
452 occupancy modelling (Figure S1).

453        Instead, a more likely explanation for this unexpected result is that low density of kelp  
454 forest fishes outside the MPA increased the detection of non-kelp forest taxa advected from  
455 elsewhere. In total, 46.4% of taxa detected outside the MPA were non-rocky reef species  
456 such as California angel shark (*Squatina californica*, Squatinidae), Chub mackerel  
457 (*Scomber japonicus*, Scombridae), and Ocean sunfish (*Mola mola*, Molidae). Although  
458 these species occasionally pass through nearshore rocky reef environments, a more likely  
459 explanation is that eDNA from these species were transported from nearby pelagic,  
460 intertidal, and sandy bottom ecosystems (16,35). While such transport would be expected at  
461 all sites, high fish abundance inside the MPA would likely result in a strongly skewed ratio  
462 of endogenous kelp forest eDNA to exogenous pelagic eDNA (16), with the signal of kelp  
463 forest taxa dominating that of pelagic species.

464        This paradoxical pattern of species richness highlights that eDNA data must be  
465 interpreted with caution (43). Metabarcoding methods often perform unexpectedly when  
466 DNA concentrations are low, increasing the probability of sequencing rare species (8).  
467 Thus additional ecological metrics to species richness, ones that are more representative of  
468 ecological patterns and processes, are needed to optimally interpret eDNA results (15).  
469 These results ultimately highlight the value of ground truthing eDNA results with visual  
470 surveys in novel applications to ensure proper interpretation of results (41).

## 471 **Conclusion**

472 Marine protected areas are indispensable tools for protecting marine ecosystems and effective  
473 monitoring is paramount to their success (1). Our results demonstrate that eDNA can  
474 distinguish fish assemblages inside and outside MPAs, and can detect other vertebrates, like  
475 marine mammals and birds, of special conservation concern.

476        Given its power, ease of sampling and relative affordability, eDNA could provide critical  
477 cost-added-benefits of repeated temporal or expanded spatial sampling of marine protected

478 areas. In particular, eDNA metabarcoding can overcome many of the current limitations of  
479 visual monitoring, increasing sampling frequency and expanding monitoring beyond a small  
480 subset of “important” focal taxa. Such expanded monitoring would improve our ability to  
481 understand the ecological processes, human impacts, and management strategies that affect  
482 marine community communities that MPAs are designed to protect.

483 However, important aspects of eDNA remain unresolved, notably determining  
484 abundance and biomass via eDNA (44). Given the mixed results on the efficacy of biomass  
485 estimates from eDNA in marine systems (8,44), eDNA will not be viewed yet as a  
486 wholesale replacement for visual monitoring, but instead as a powerful complementary  
487 tool. There will always be value in the direct observation by divers in particular for  
488 informing size class distributions and sex ratios (24), but eDNA provides an important way  
489 to simultaneously make surveys more comprehensive and efficient. By replacing aspects of  
490 underwater visual surveys, eDNA could reduce the dive time per site, allowing more sites  
491 to be surveyed more frequently or improve overall biodiversity estimates. Additionally,  
492 whereas it takes 3 months for the Kelp Forest Monitoring Program to complete diver-based  
493 surveys, field collection of eDNA could be completed in a week, allowing for surveys to  
494 occur during short periods of good weather in the winter when full visual surveys would be  
495 impossible. As such, eDNA could greatly expand current monitoring activities across  
496 space, time, and depth, providing resource managers critical information on the response of  
497 MPAs to changing environments and management practices, and contributing greatly to  
498 marine sustainability.

499

500 **Author Contributions:** Conceptualization, Z.G., J.S., D.K., E.Z., and P.B.; methodology,  
501 Z.G.; field work, Z.G., E.Z., and J.S.; lab work Z.G. and E.Z.; bioinformatics, Z.G.; formal  
502 analysis, Z.G.; resources, Z.G.; data curation, Z.G.; writing—original draft preparation,  
503 Z.G., J.S., D.K., E.Z., and P.B.; writing—review and editing, Z.G., J.S., D.K., E.Z., and

504 P.B.; visualization, Z.G.; supervision, D.K. and P.B.; project administration, Z.G. and P.B.;  
505 funding acquisition, Z.G. and P.B. All authors have read and agreed to the published  
506 version of the manuscript.

507

508 **Acknowledgments:** We thank the Channel Islands National Park Service and Kelp Forest  
509 Monitoring Program divers for conducting underwater visual censuses. We gratefully  
510 acknowledge Tiara Moore, Nick Schooler, Rachel Turba, and Lucia Bertero for their  
511 tireless help in the field collection of eDNA samples. We also acknowledge Taylor Ely and  
512 Onny Marwayana for assistance with laboratory work.

513

514 **Data Availability:** We intend to archive all data on the Dryad Digital Repository and a link  
515 will be provided upon acceptance.

516

## 517 **References**

- 518 1. Edgar GJ, Stuart-Smith RD, Willis TJ, Kininmonth S, Baker SC, Banks S, et al. Global  
519 conservation outcomes depend on marine protected areas with five key features.  
520 *Nature*. 2014;506(7487).
- 521 2. Nickols KJ, White JW, Malone D, Carr MH, Starr RM, Baskett ML, et al. Setting  
522 ecological expectations for adaptive management of marine protected areas. *J Appl*  
523 *Ecol*. 2019;56(10):2376–85.
- 524 3. Usseglio P. *Ecology of Fishes on Coral Reefs*. Cambridge University Press; 2015. 388  
525 p.

- 526 4. Sprague J. Personal Observation Joshua Sprague. 2020;
- 527 5. Lindfield SJ, Harvey ES, McIlwain JL, Halford AR. Silent fish surveys: bubble-free  
528 diving highlights inaccuracies associated with SCUBA-based surveys in heavily  
529 fished areas. Börger L, editor. *Methods Ecol Evol* [Internet]. 2014 Oct 1 [cited 2017  
530 Jul 31];5(10):1061–9. Available from: [http://doi.wiley.com/10.1111/2041-](http://doi.wiley.com/10.1111/2041-210X.12262)  
531 [210X.12262](http://doi.wiley.com/10.1111/2041-210X.12262)
- 532 6. Pondella II DJ, Caselle JE, Claisse JT, Williams JP, Davis K, Williams CM, et al.  
533 Baseline Characterization of the Shallow Rocky Reef and Kelp Forest Ecosystems of  
534 the South Coast Study Region. 2015; Available from:  
535 [https://caseagrants.ucsd.edu/news/summaries-of-projects-selected-for-funding-](https://caseagrants.ucsd.edu/news/summaries-of-projects-selected-for-funding-through-the-south-coast-mpa-baseline-program)  
536 [through-the-south-coast-mpa-baseline-program](https://caseagrants.ucsd.edu/news/summaries-of-projects-selected-for-funding-through-the-south-coast-mpa-baseline-program)
- 537 7. Bernard ATF, Götz A, Kerwath SE, Wilke CG. Observer bias and detection  
538 probability in underwater visual census of fish assemblages measured with  
539 independent double-observers. *J Exp Mar Bio Ecol* [Internet]. 2013 May [cited 2017  
540 Jul 31];443:75–84. Available from:  
541 <http://linkinghub.elsevier.com/retrieve/pii/S0022098113001007>
- 542 8. Deiner K, Bik HM, Mächler E, Seymour M, Lacoursière-Roussel A, Altermatt F, et  
543 al. Environmental DNA metabarcoding: Transforming how we survey animal and  
544 plant communities. *Mol Ecol* [Internet]. 2017 Nov 1 [cited 2018 Feb 6];26(21):5872–  
545 95. Available from: <http://doi.wiley.com/10.1111/mec.14350>

- 546 9. Kelly RP, Port J a., Yamahara KM, Martone RG, Lowell N, Thomsen PF, et al.  
547 Harnessing DNA to improve environmental management. *Science* (80- ).  
548 2014;344(6191).
- 549 10. Thomsen PF, Kielgast J, Iversen LL, Møller PR, Rasmussen M, Willerslev E.  
550 Detection of a diverse marine fish fauna using environmental DNA from seawater  
551 samples. *PLoS One* [Internet]. 2012 Jan 29 [cited 2015 Nov 6];7(8):e41732. Available  
552 from: <http://journals.plos.org/plosone/article?id=10.1371/journal.pone.0041732>
- 553 11. Willis TJ. Visual census methods underestimate density and diversity of cryptic reef  
554 fishes. *J Fish Biol.* 2001;59(5):1408–11.
- 555 12. Port JA, O'Donnell JL, Romero-Maraccini OC, Leary PR, Litvin SY, Nickols KJ, et  
556 al. Assessing vertebrate biodiversity in a kelp forest ecosystem using environmental  
557 DNA. *Mol Ecol.* 2015;
- 558 13. Miya M, Minamoto T, Yamanaka H, Oka S, Sato K, Yamamoto S, et al. Use of a Filter  
559 Cartridge for Filtration of Water Samples and Extraction of Environmental DNA. *J*  
560 *Vis Exp* [Internet]. 2016 Nov 25 [cited 2017 Jul 1];(117):e54741–e54741. Available  
561 from: [http://www.jove.com/video/54741/use-filter-cartridge-for-filtration-water-](http://www.jove.com/video/54741/use-filter-cartridge-for-filtration-water-samples-extraction)  
562 [samples-extraction](http://www.jove.com/video/54741/use-filter-cartridge-for-filtration-water-samples-extraction)
- 563 14. Yamahara KM, Preston CM, Birch JM, Walz KR, Marin III R, Jensen S, et al. In-situ  
564 Autonomous Acquisition and Preservation of Marine Environmental DNA Using an  
565 Autonomous Underwater Vehicle. *Front Mar Sci.* 2019;6:373.

- 566 15. Kelly RP, Shelton AO, Gallego R. Understanding PCR processes to Draw Meaningful  
567 conclusions from environmental DNA Studies. *Sci Rep.* 2019;9(1):1–14.
- 568 16. Andruszkiewicz EA, Koseff JR, Fringer OB, Ouellette NT, Lowe AB, Edwards CA,  
569 et al. Modeling environmental DNA transport in the coastal ocean using Lagrangian  
570 particle tracking. *Front Mar Sci.* 2019;6:477.
- 571 17. Alberdi A, Aizpurua O, Gilbert MTP, Bohmann K. Scrutinizing key steps for reliable  
572 metabarcoding of environmental samples. *Methods Ecol Evol* [Internet].  
573 2018;9(1):134–47. Available from: <https://doi.org/10.1111/2041-210X.12849>
- 574 18. Chambert T, Pilliod DS, Goldberg CS, Doi H, Takahara T. An analytical framework  
575 for estimating aquatic species density from environmental DNA. *Ecol Evol.* 2018 Mar  
576 1;8(6):3468–77.
- 577 19. Doi H, Fukaya K, Oka S, Sato K, Kondoh M, Miya M. Evaluation of detection  
578 probabilities at the water-filtering and initial PCR steps in environmental DNA  
579 metabarcoding using a multispecies site occupancy model. *Sci Rep.* 2019;9(1):3581.
- 580 20. Murakami H, Yoon S, Kasai A, Minamoto T, Yamamoto S, Sakata MK, et al.  
581 Dispersion and degradation of environmental DNA from caged fish in a marine  
582 environment. *Fish Sci.* 2019;85(2):327–37.
- 583 21. Collins RA, Wangensteen OS, O’Gorman EJ, Mariani S, Sims DW, Genner MJ.  
584 Persistence of environmental DNA in marine systems. *Commun Biol.* 2018;1(1):1–



- 585 11.
- 586 22. Kelly RP, Gallego R, Jacobs-Palmer E. The effect of tides on nearshore environmental  
587 DNA. *PeerJ*. 2018;6:e4521.
- 588 23. Kushner DJ, Rassweiler A, McLaughlin JP, Lafferty KD. A multi-decade time series  
589 of kelp forest community structure at the California Channel Islands. *Ecology*.  
590 2013;94(11):2655.
- 591 24. Caselle JE, Rassweiler A, Hamilton SL, Warner RR. Recovery trajectories of kelp  
592 forest animals are rapid yet spatially variable across a network of temperate marine  
593 protected areas. *Sci Rep* [Internet]. 2015 Jan [cited 2016 Feb 22];5:14102. Available  
594 from:  
595 [http://www.pubmedcentral.nih.gov/articlerender.fcgi?artid=4642697&tool=pmcentre](http://www.pubmedcentral.nih.gov/articlerender.fcgi?artid=4642697&tool=pmcentrez&rendertype=abstract)  
596 [z&rendertype=abstract](http://www.pubmedcentral.nih.gov/articlerender.fcgi?artid=4642697&tool=pmcentrez&rendertype=abstract)
- 597 25. Thomsen PF, Møller PR, Sigsgaard EE, Knudsen SW, Jørgensen OA, Willerslev E.  
598 Environmental DNA from seawater samples correlate with trawl catches of subarctic,  
599 deepwater fishes. *PLoS One*. 2016;11(11).
- 600 26. Miya M, Sato Y, Fukunaga T, Sado T, Poulsen JY, Sato K, et al. MiFish, a set of  
601 universal PCR primers for metabarcoding environmental DNA from fishes: detection  
602 of more than 230 subtropical marine species. *R Soc Open Sci* [Internet]. 2015 Jul 1  
603 [cited 2015 Jul 28];2(7):150088. Available from:  
604 <http://rsos.royalsocietypublishing.org/content/2/7/150088.abstract>

- 605 27. Spens J, Evans AR, Halfmaerten D, Knudsen SW, Sengupta ME, Mak SST, et al.  
606 Comparison of capture and storage methods for aqueous microbial eDNA using an  
607 optimized extraction protocol: advantage of enclosed filter. Yu D, editor. *Methods*  
608 *Ecol Evol* [Internet]. 2017 May 1 [cited 2018 Sep 13];8(5):635–45. Available from:  
609 <http://doi.wiley.com/10.1111/2041-210X.12683>
- 610 28. Curd EE, Gold Z, Kandlikar GS, Gomer J, Ogden M, O’Connell T, et al. Anacapa: an  
611 environmental DNA toolkit for processing multilocus metabarcode datasets. *Methods*  
612 *Ecol Evol*. 2019;10:1469– 1475.
- 613 29. Gold ZJ. Design and Implementation of Environmental DNA Metabarcoding Methods  
614 for Monitoring the Southern California Marine Protected Area Network [Internet].  
615 UCLA; 2020. Available from: <https://escholarship.org/uc/item/7zf5g0cb>
- 616 30. McKnight DT, Huerlimann R, Bower DS, Schwarzkopf L, Alford RA, Zenger KR.  
617 microDecon: A highly accurate read-subtraction tool for the post-sequencing removal  
618 of contamination in metabarcoding studies. *Environ DNA*. 2019;
- 619 31. Oksanen J, Blanchet FG, Kindt R, Legendre P, Minchin PR, O’hara RB, et al. Package  
620 ‘vegan.’ *Community Ecol Packag* version. 2013;2(9).
- 621 32. Hsieh TC, Ma KH, Chao A. iNEXT: an R package for rarefaction and extrapolation  
622 of species diversity (Hill numbers). *Methods Ecol Evol*. 2016;7(12):1451–6.
- 623 33. Muggeo VMR. Segmented: an R package to fit regression models with broken-line

- 624 relationships. *R news*. 2008;8(1):20–5.
- 625 34. Yamamoto S, Minami K, Fukaya K, Takahashi K, Sawada H, Murakami H, et al.  
626 Environmental DNA as a “snapshot” of fish distribution: A case study of Japanese  
627 jack mackerel in Maizuru Bay, Sea of Japan. *PLoS One*. 2016;11(3).
- 628 35. O’Donnell JL, Kelly RP, Shelton AO, Samhouri JF, Lowell NC, Williams GD. Spatial  
629 distribution of environmental DNA in a nearshore marine habitat. *PeerJ* [Internet].  
630 2017 Feb 28 [cited 2017 Jul 31];5:e3044. Available from:  
631 <https://peerj.com/articles/3044>
- 632 36. Sanford E, Sones JL, García-Reyes M, Goddard JHRR, Largier JL. Widespread shifts  
633 in the coastal biota of northern California during the 2014–2016 marine heatwaves.  
634 *Sci Rep*. 2019 Dec 1;9(1):4216.
- 635 37. Hyde JR, Vetter RD. The origin, evolution, and diversification of rockfishes of the  
636 genus *Sebastes* (Cuvier). *Mol Phylogenet Evol* [Internet]. 2007 Aug [cited 2015 Nov  
637 6];44(2):790–811. Available from:  
638 <http://www.sciencedirect.com/science/article/pii/S1055790306004945>
- 639 38. Williams GD, Levin PS, Palsson WA. Rockfish in Puget Sound: An ecological history  
640 of exploitation. *Mar Policy*. 2010;34(5):1010–20.
- 641 39. Behrents KC. The comparative ecology and interactions between two sympatric  
642 gobies (*Lythrypnus dalli* and *Lythrypnus zebra*). University of Southern California;

- 643            1984.
- 644    40.    Love MS, Passarelli JK. Miller and Lea's Guide to the Coastal Marine Fishes of  
645            California. 2nd. University of California Agriculture and Natural Resources; 2020.
- 646    41.    Kelly RP, Closek CJ, O'Donnell JL, Kralj JE, Shelton AO, Samhuri JF. Genetic and  
647            manual survey methods yield different and complementary views of an ecosystem.  
648            *Front Mar Sci.* 2017;3:283.
- 649    42.    Lester SE, Halpern BS. Biological responses in marine no-take reserves versus  
650            partially protected areas. *Mar Ecol Prog Ser.* 2008;367(4):49–56.
- 651    43.    Kelly RP, O'Donnell JL, Lowell NC, Shelton AO, Samhuri JF, Hennessey SM, et al.  
652            Genetic signatures of ecological diversity along an urbanization gradient. *PeerJ.*  
653            2016;4:e2444.
- 654    44.    Shelton AO, Kelly RP, O'Donnell JL, Park L, Schwenke P, Greene C, et al.  
655            Environmental DNA provides quantitative estimates of a threatened salmon species.  
656            *Biol Conserv.* 2019 Sep;237:383–91.
- 657

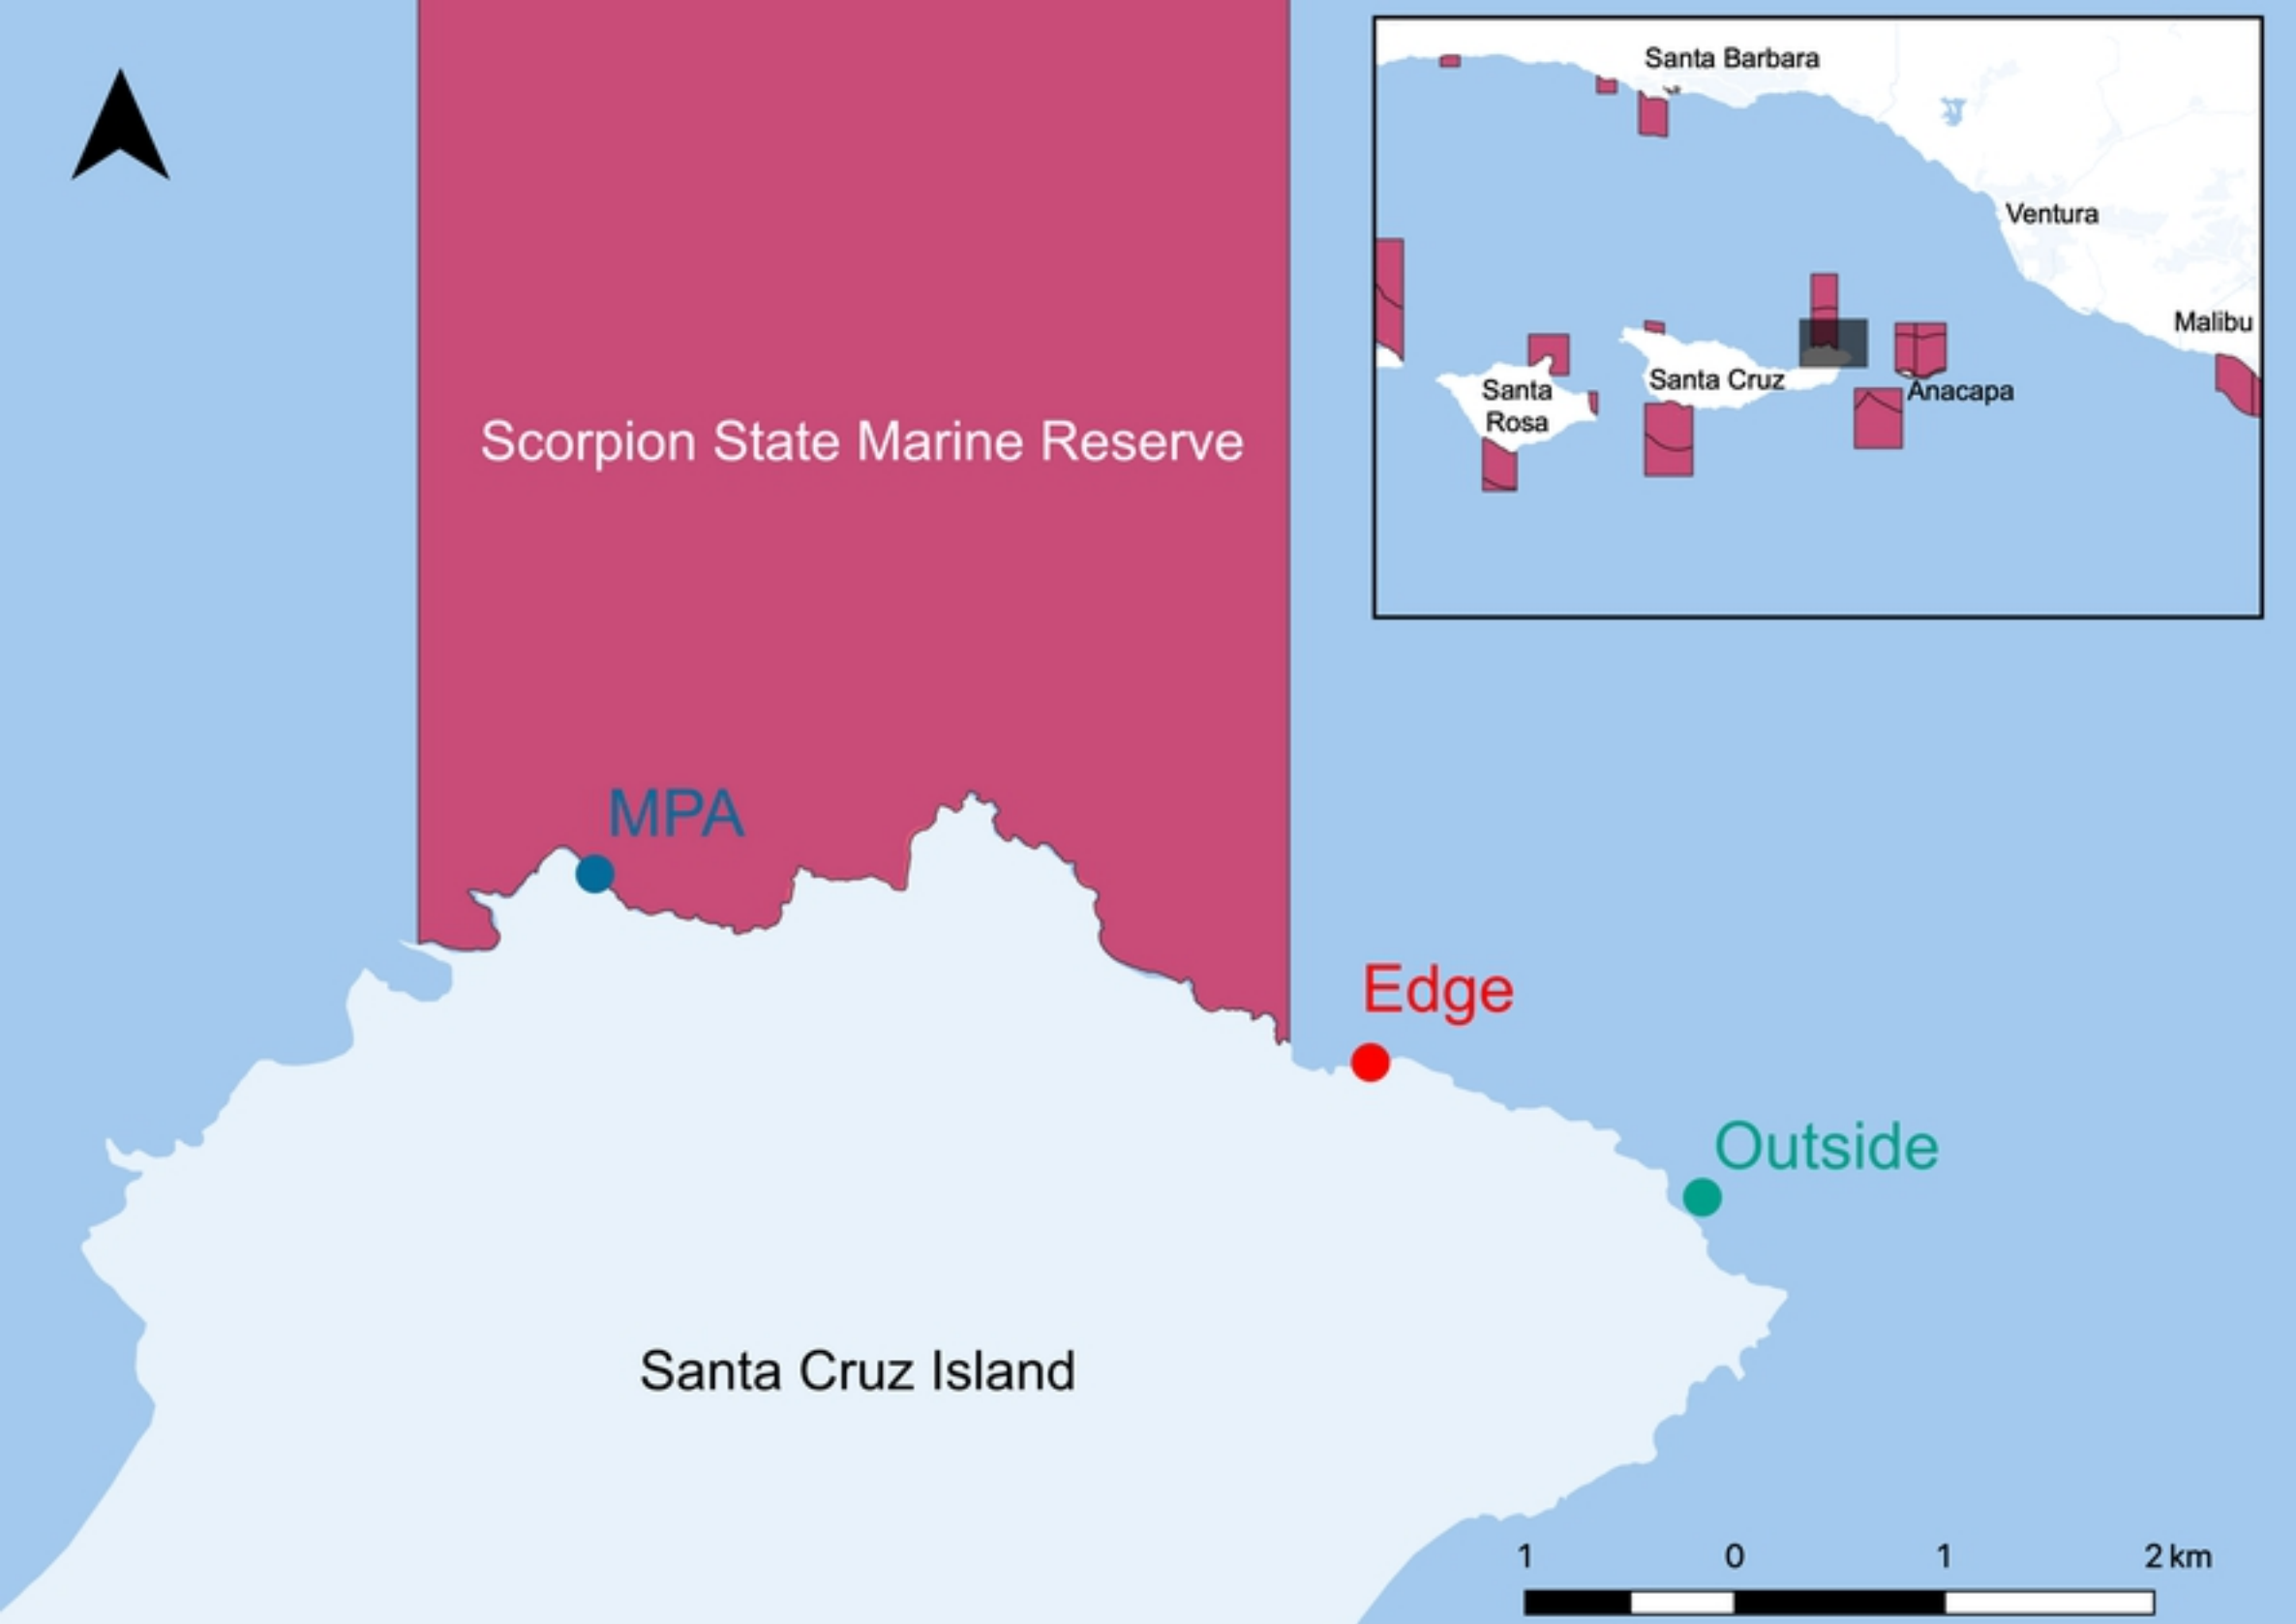

Figure 1

Outside

Edge

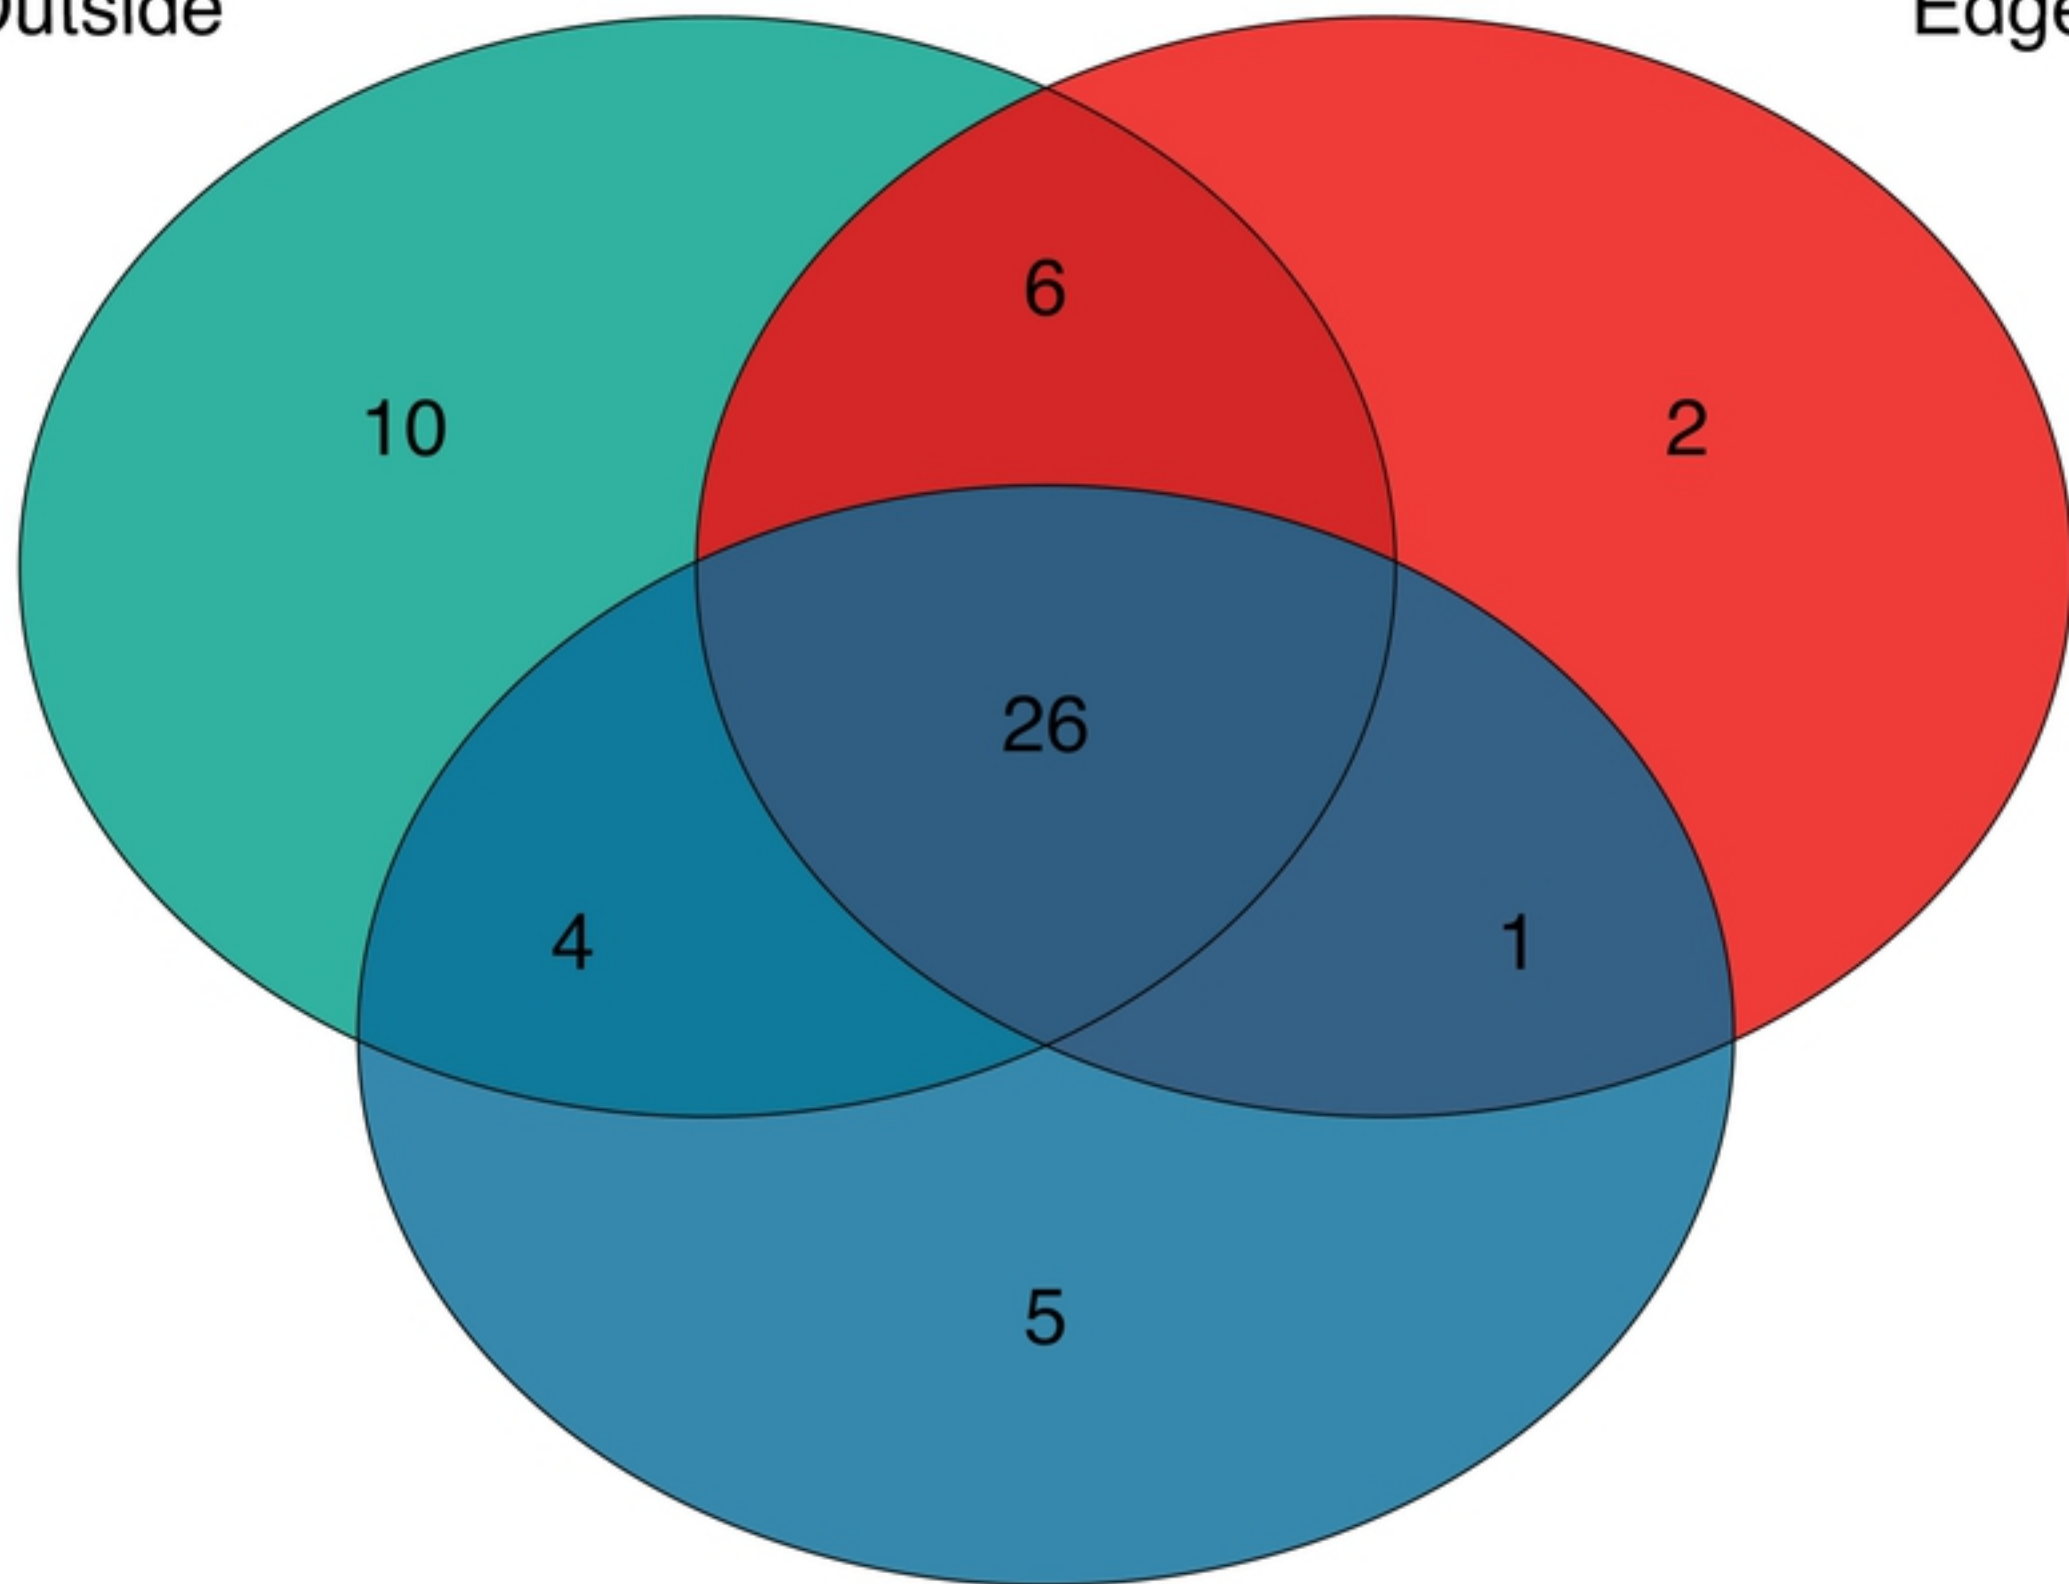

MPA

Figure 2

All Species

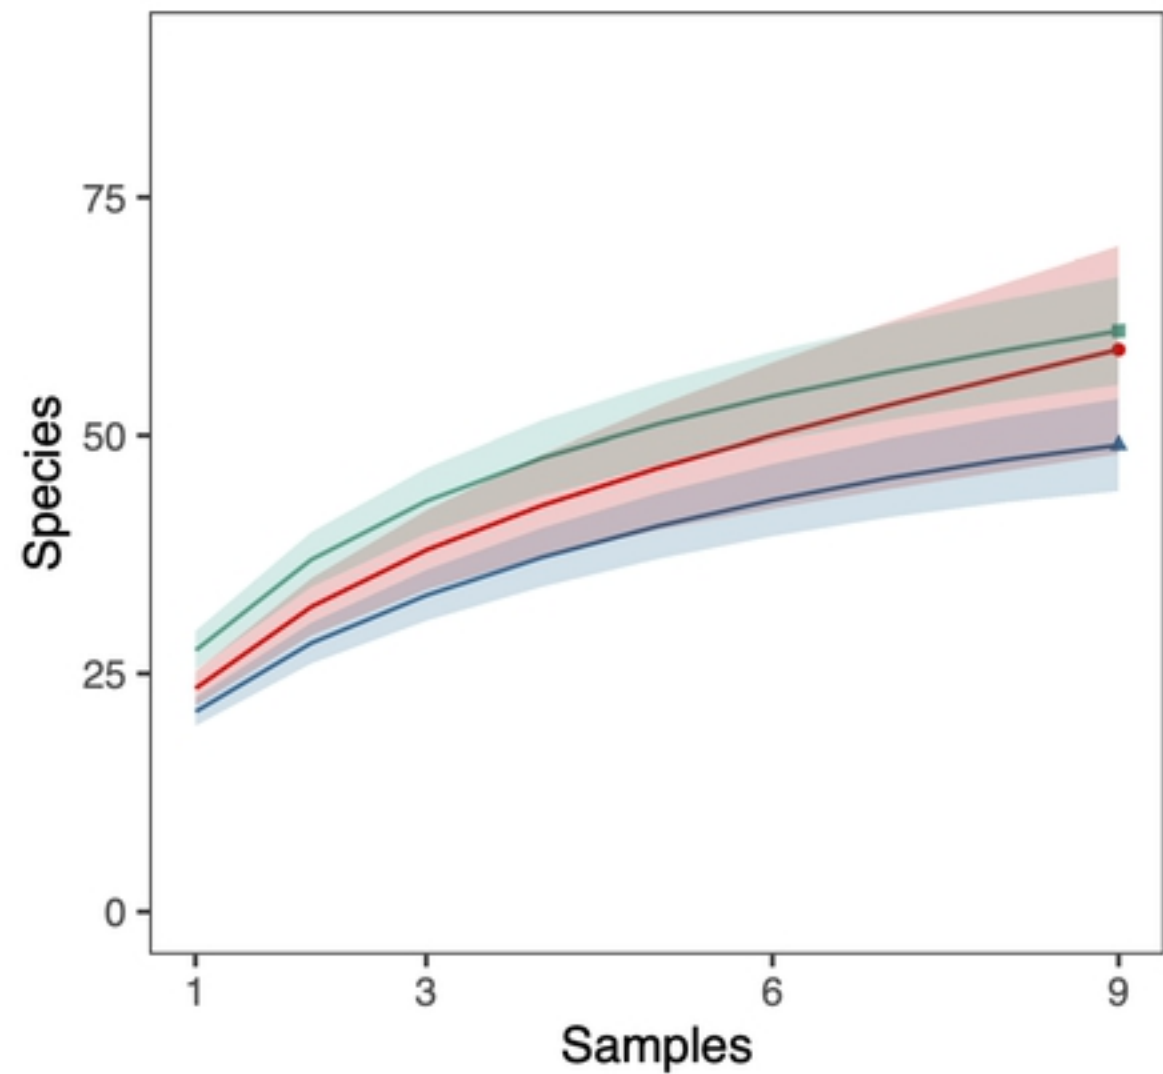

Species with Occupancy > 75%

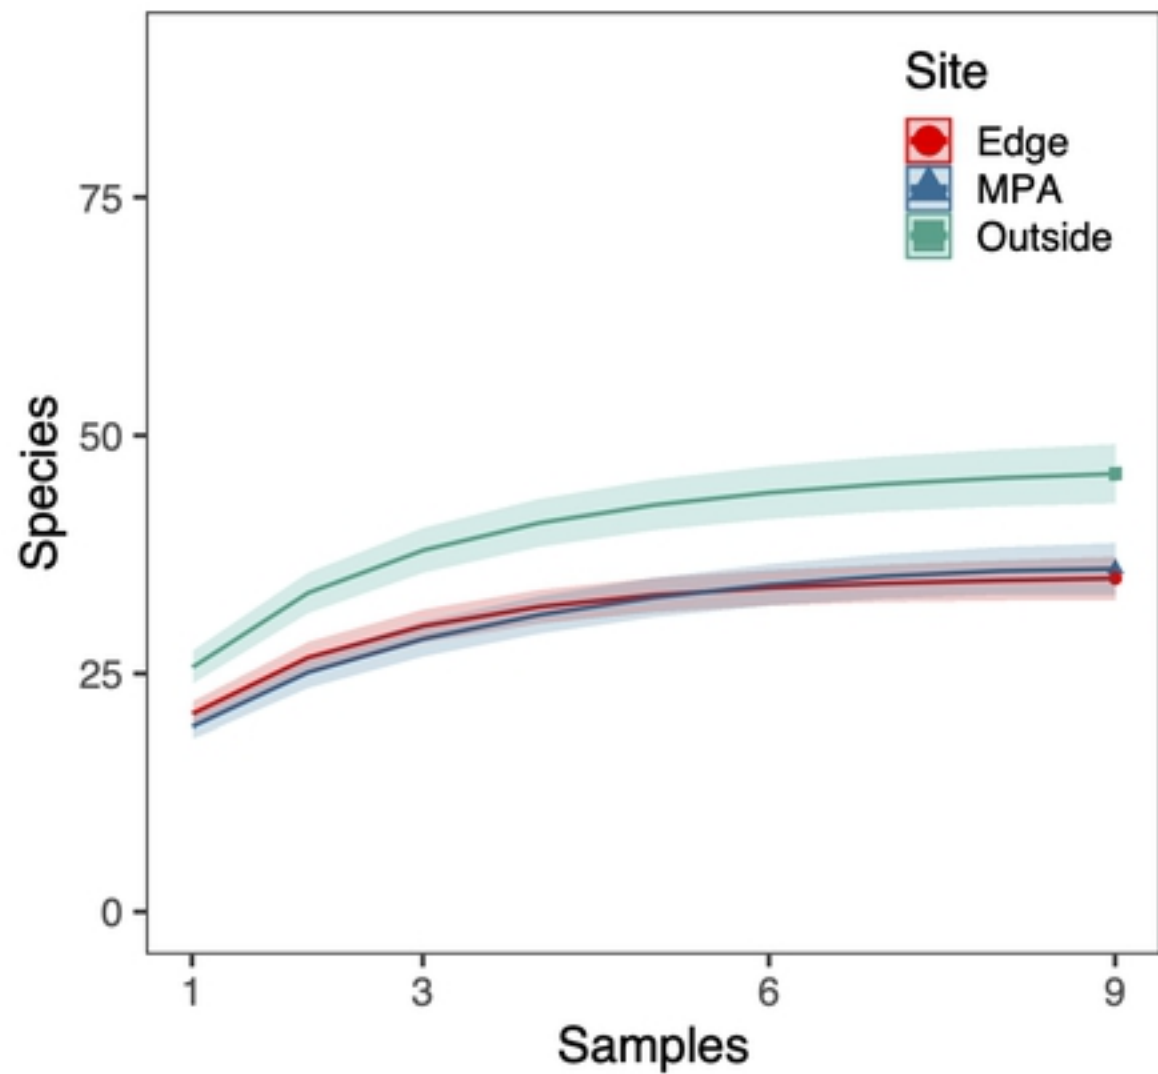

Figure 3

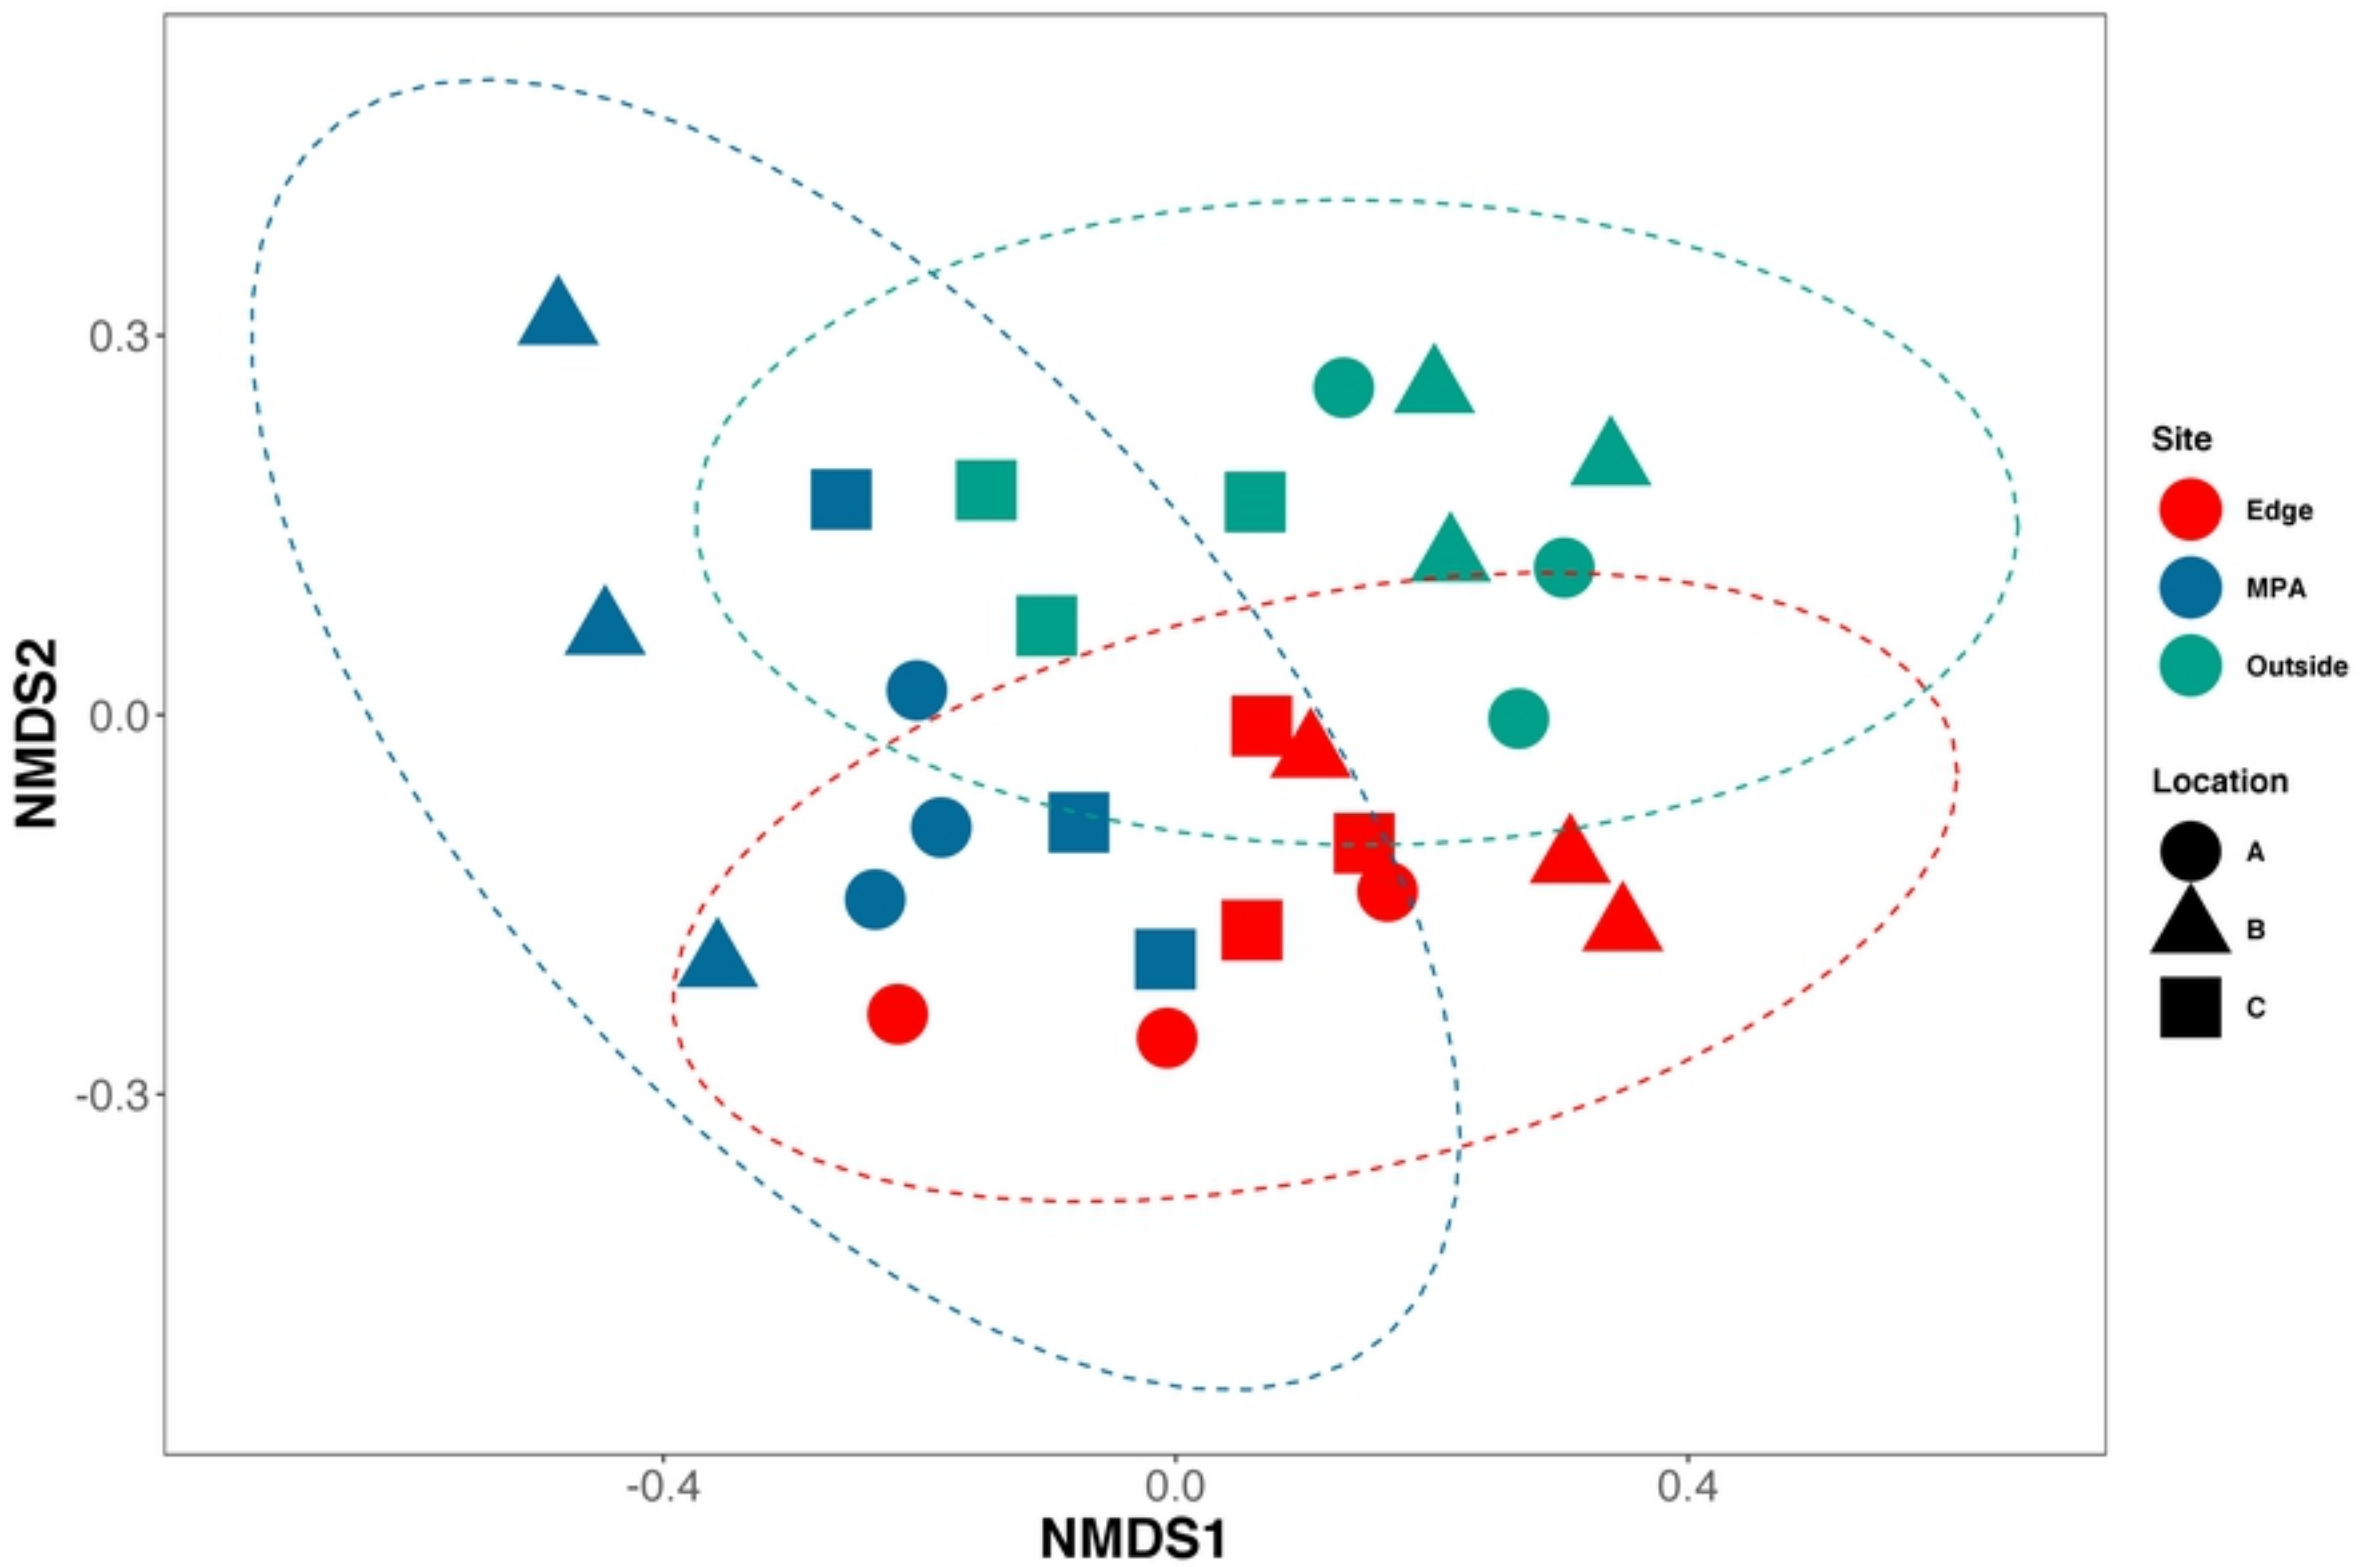

Figure 4



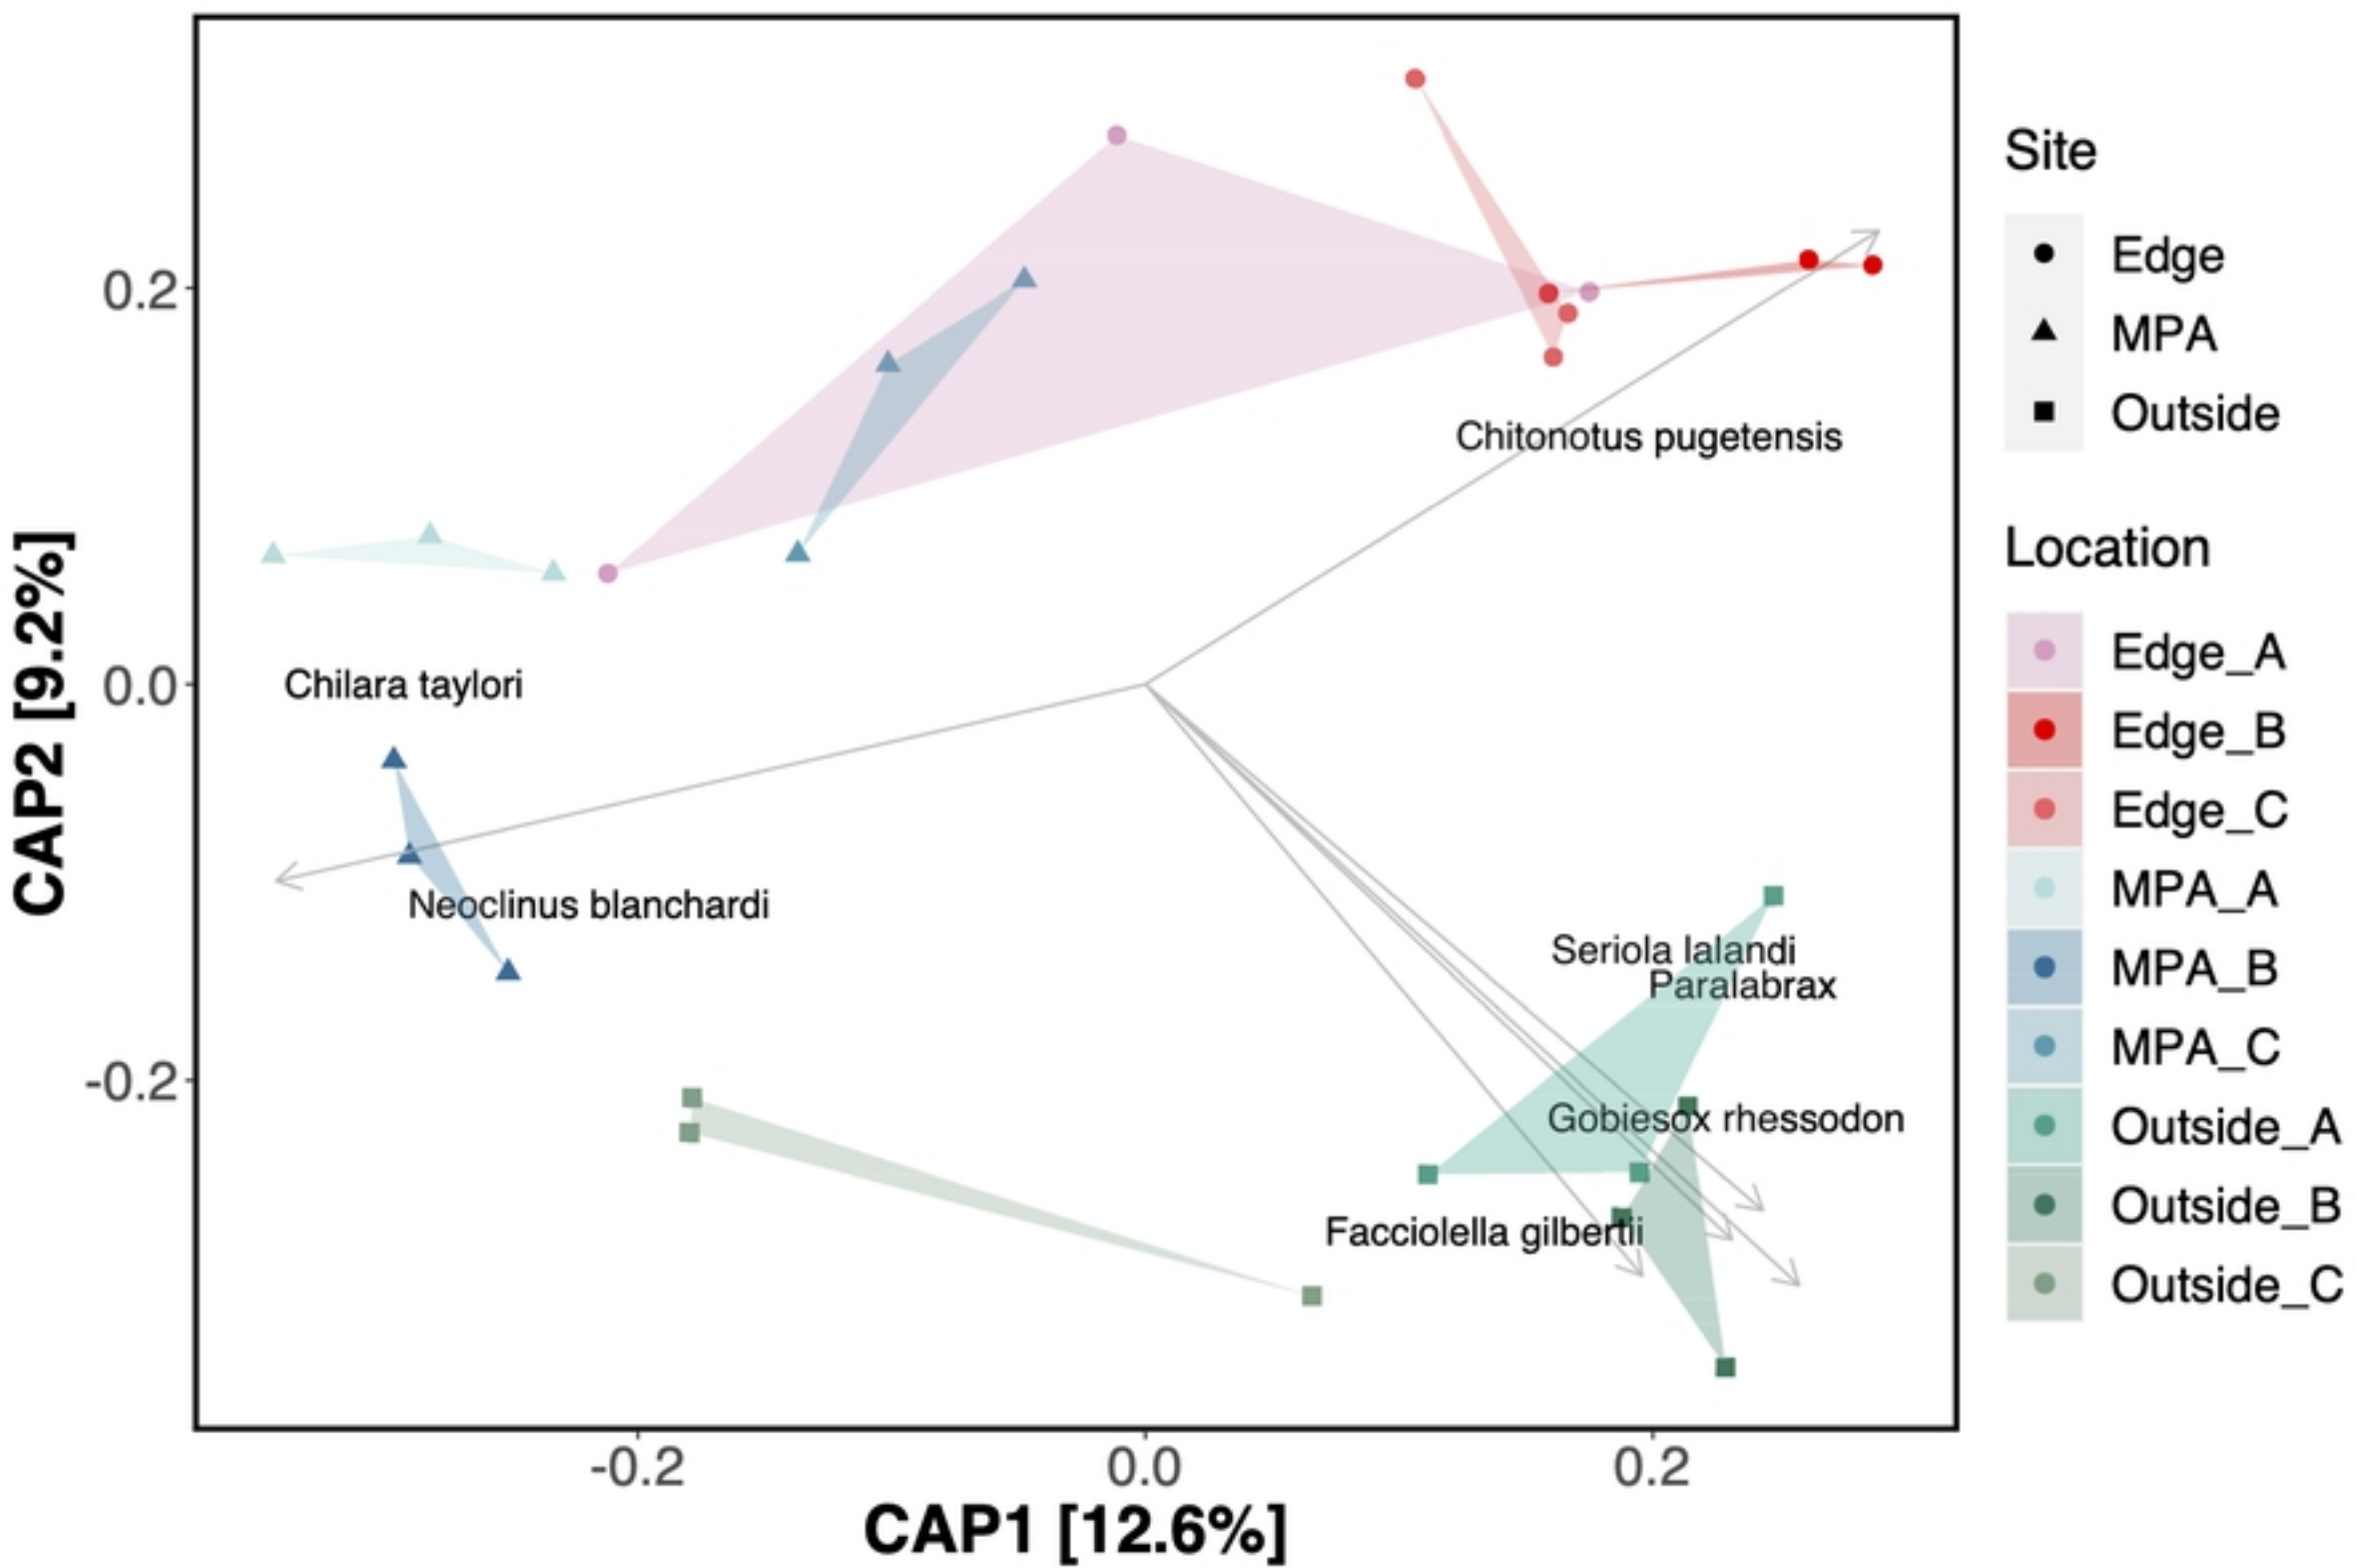

Figure 5

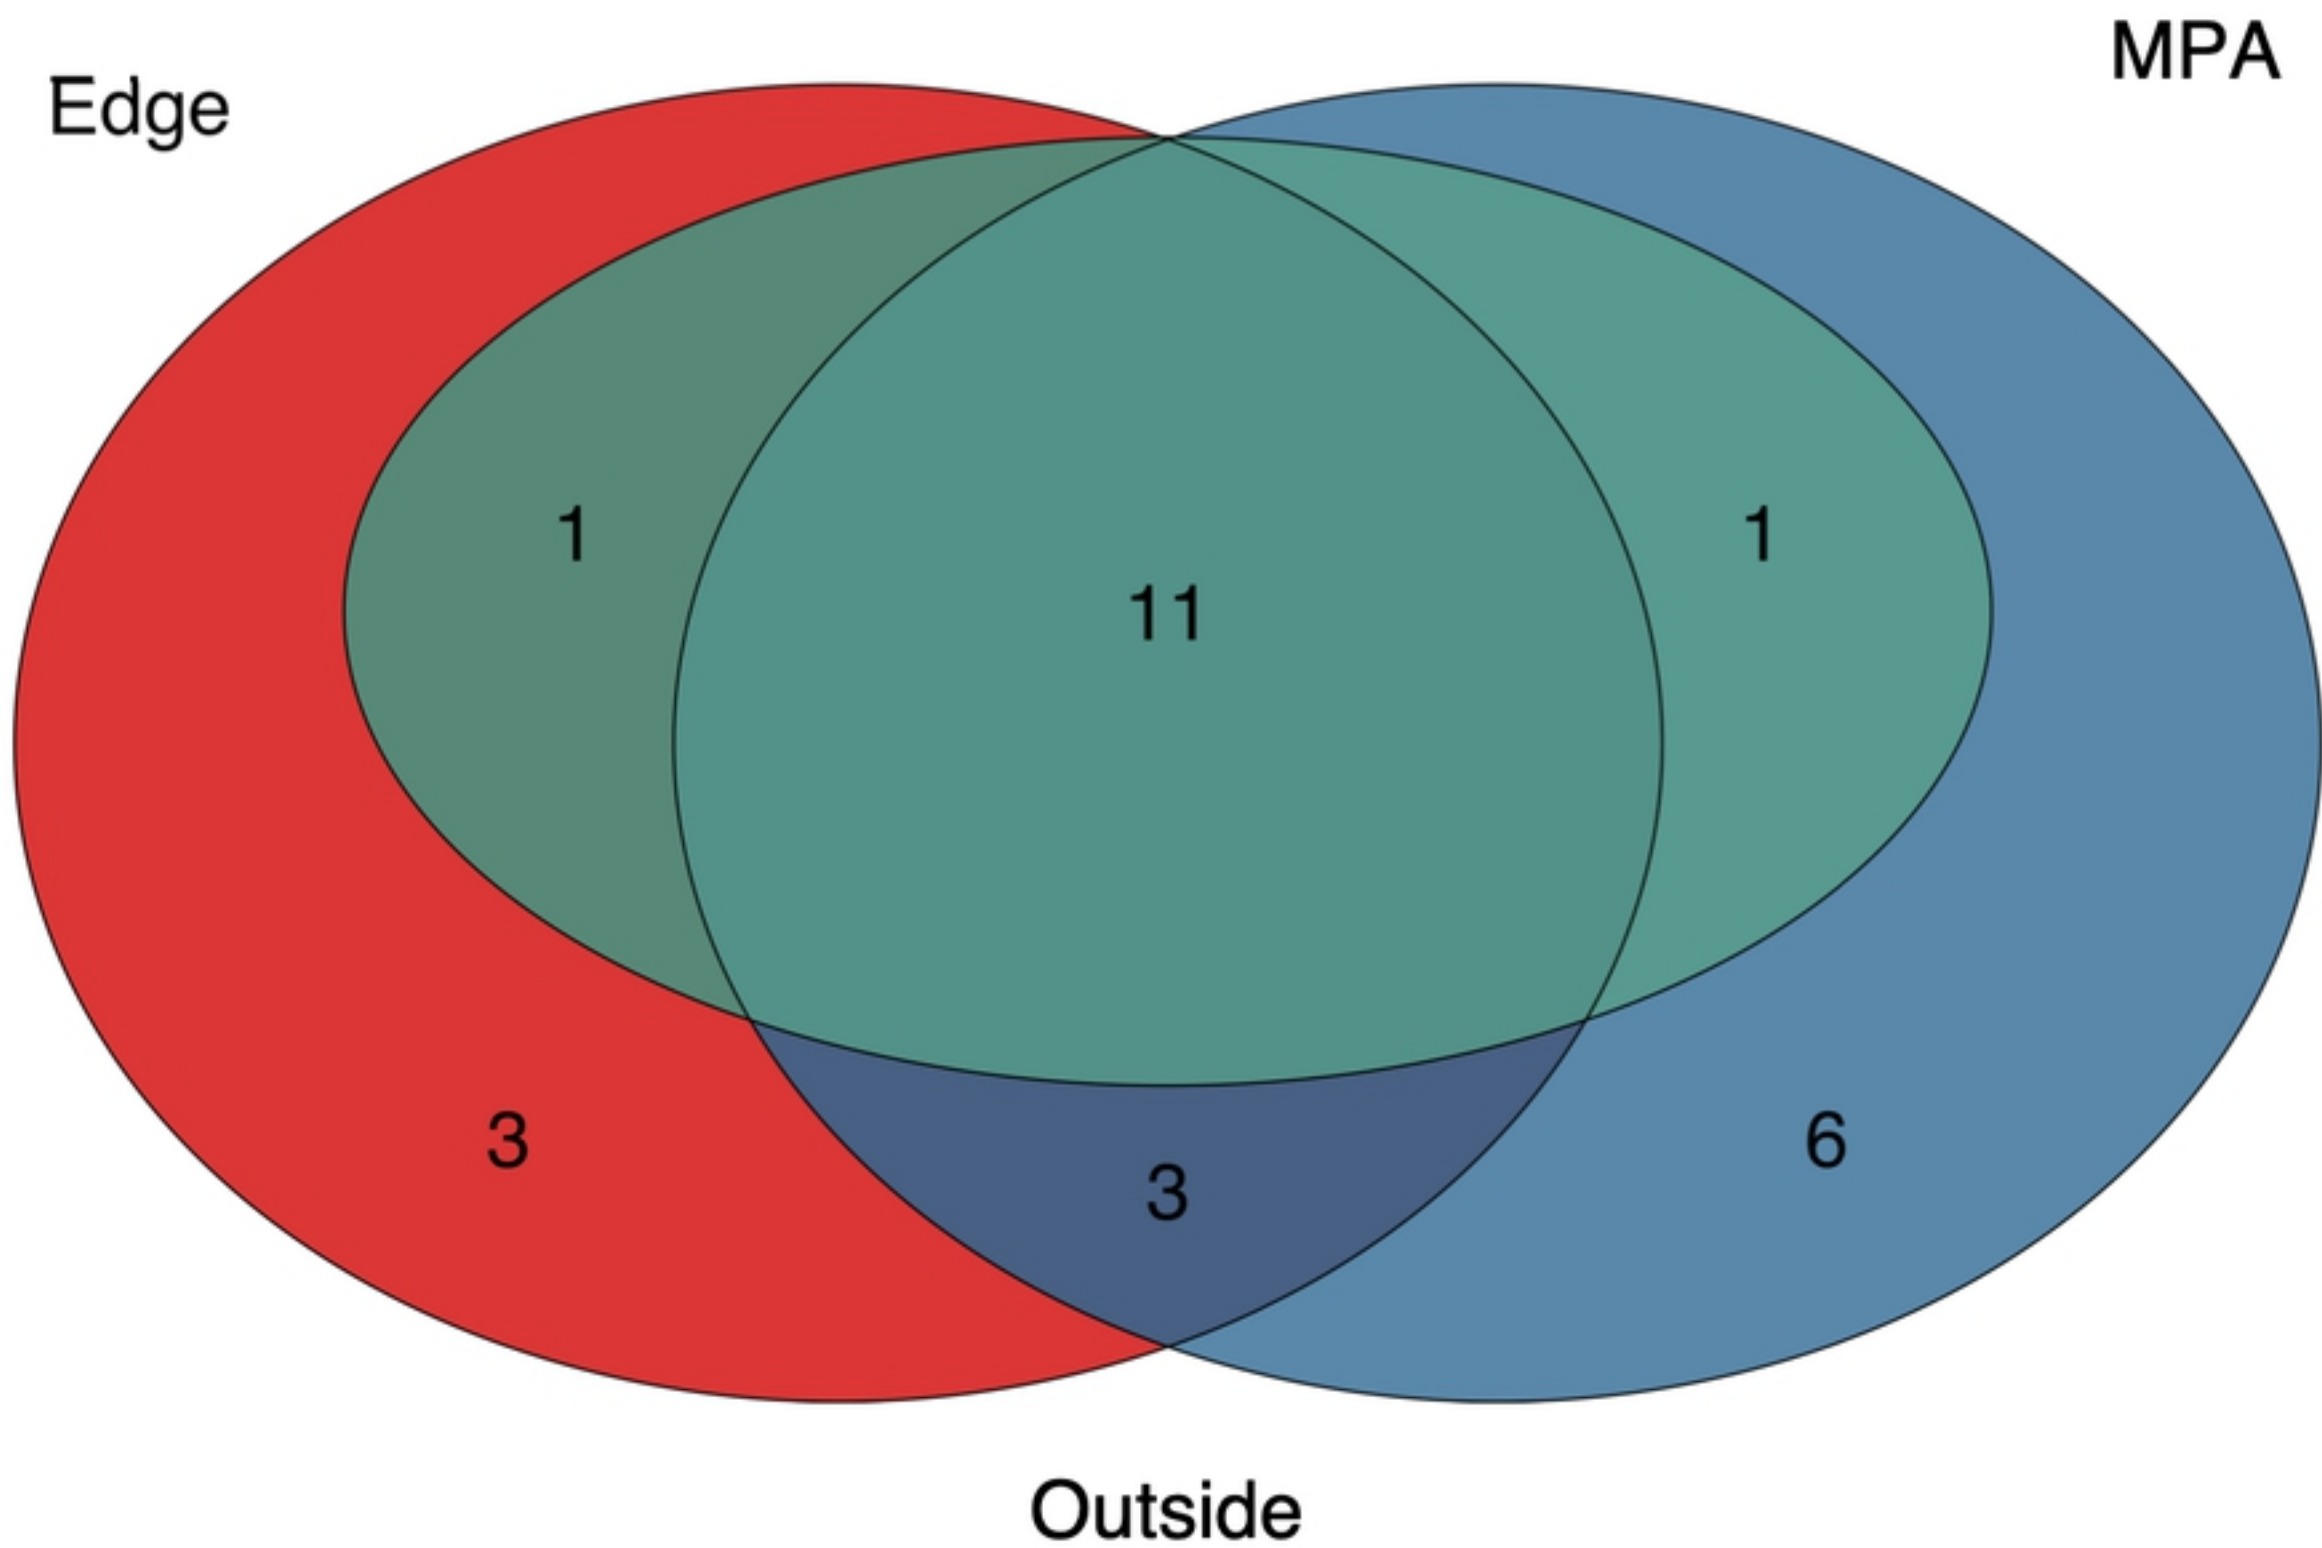

Figure 6
